# Supplementary material for: Triangulenium dyes: the comprehensive photo-absorption and emission story of a versatile family of chromophores
Source: Royal Society of Chemistry journal article supplement (doi:10.1039/d0cp02990d), 2020-01-01
Supplement: d0cp02990d1.pdf [file d0cp02990d1.pdf]

## **Electronic Supplementary Information:**

# **Triangulenium Dyes: the Comprehensive Photo-Absorption and Emission Story of a Versatile Family of Chromophores**

Irina Barsuk,<sup>a</sup> Philippe P. Lainé,<sup>a</sup> François Maurel<sup>a</sup> and Éric Brémont<sup>\*a</sup>

<sup>a</sup> *Université de Paris, ITODYS, CNRS, F-75006 Paris, France.*

<sup>\*</sup> *E-mail: eric.bremont@u-paris.fr*

## List of Figures

- S1 UV/vis absorption spectra of TATA computed within the (left) Franck-Condon and (right) Franck-Condon-Herzberg-Teller approximations at SVWN5/6-31+G\* level of theory in acetonitrile solvent. The envelope of each spectrum is obtained by a Gaussian convolution (FWHM = 250 cm<sup>-1</sup>) of the vibronic transitions (sticks) between the S<sub>0</sub> and S<sub>1</sub> electronic states. . . . . S8
- S2 UV/vis absorption spectra of TATA computed within the (left) Franck-Condon and (right) Franck-Condon-Herzberg-Teller approximations at PBE/6-31+G\* level of theory in acetonitrile solvent. The envelope of each spectrum is obtained by a Gaussian convolution (FWHM = 250 cm<sup>-1</sup>) of the vibronic transitions (sticks) between the S<sub>0</sub> and S<sub>1</sub> electronic states. . . . . S9
- S3 UV/vis absorption spectra of TATA computed within the (left) Franck-Condon and (right) Franck-Condon-Herzberg-Teller approximations at B3LYP/6-31+G\* level of theory in acetonitrile solvent. The envelope of each spectrum is obtained by a Gaussian convolution (FWHM = 250 cm<sup>-1</sup>) of the vibronic transitions (sticks) between the S<sub>0</sub> and S<sub>1</sub> electronic states. . . . . S10
- S4 UV/vis absorption spectra of TATA computed within the (left) Franck-Condon and (right) Franck-Condon-Herzberg-Teller approximations at PBE0/6-31+G\* level of theory in acetonitrile solvent. The envelope of each spectrum is obtained by a Gaussian convolution (FWHM = 250 cm<sup>-1</sup>) of the vibronic transitions (sticks) between the S<sub>0</sub> and S<sub>1</sub> electronic states. . . . . S11
- S5 UV/vis absorption spectra of TATA computed within the (left) Franck-Condon and (right) Franck-Condon-Herzberg-Teller approximations at M06/6-31+G\* level of theory in acetonitrile solvent. The envelope of each spectrum is obtained by a Gaussian convolution (FWHM = 250 cm<sup>-1</sup>) of the vibronic transitions (sticks) between the S<sub>0</sub> and S<sub>1</sub> electronic states. . . . . S12
- S6 UV/vis absorption spectra of TATA computed within the (left) Franck-Condon and (right) Franck-Condon-Herzberg-Teller approximations at BMK/6-31+G\* level of theory in acetonitrile solvent. The envelope of each spectrum is obtained by a Gaussian convolution (FWHM = 250 cm<sup>-1</sup>) of the vibronic transitions (sticks) between the S<sub>0</sub> and S<sub>1</sub> electronic states. . . . . S13
- S7 UV/vis absorption spectra of TATA computed within the (left) Franck-Condon and (right) Franck-Condon-Herzberg-Teller approximations at M06-2X/6-31+G\* level of theory in acetonitrile solvent. The envelope of each spectrum is obtained by a Gaussian convolution (FWHM = 250 cm<sup>-1</sup>) of the vibronic transitions (sticks) between the S<sub>0</sub> and S<sub>1</sub> electronic states. . . . . S14
- S8 UV/vis absorption spectra of TATA computed within the (left) Franck-Condon and (right) Franck-Condon-Herzberg-Teller approximations at M06-HF/6-31+G\* level of theory in acetonitrile solvent. The envelope of each spectrum is obtained by a Gaussian convolution (FWHM = 250 cm<sup>-1</sup>) of the vibronic transitions (sticks) between the S<sub>0</sub> and S<sub>1</sub> electronic states. . . . . S15
- S9 UV/vis absorption spectra of TATA computed within the (left) Franck-Condon and (right) Franck-Condon-Herzberg-Teller approximations at ωB97XD/6-31+G\* level of theory in acetonitrile solvent. The envelope of each spectrum is obtained by a Gaussian convolution (FWHM = 250 cm<sup>-1</sup>) of the vibronic transitions (sticks) between the S<sub>0</sub> and S<sub>1</sub> electronic states. . . . . S16
- S10 UV/vis absorption spectra of TATA computed within the (left) Franck-Condon and (right) Franck-Condon-Herzberg-Teller approximations at CAM-B3LYP/6-31+G\* level of theory in acetonitrile solvent. The envelope of each spectrum is obtained by a Gaussian convolution (FWHM = 250 cm<sup>-1</sup>) of the vibronic transitions (sticks) between the S<sub>0</sub> and S<sub>1</sub> electronic states. . . . . S17

|     |                                                                                                                                                                                                                                                                                                                                                                                                                     |     |
|-----|---------------------------------------------------------------------------------------------------------------------------------------------------------------------------------------------------------------------------------------------------------------------------------------------------------------------------------------------------------------------------------------------------------------------|-----|
| S11 | UV/vis absorption spectra of ADOTA computed within the (left) Franck-Condon and (right) Franck-Condon-Herzberg-Teller approximations at SVWN5/6-31+G* level of theory in acetonitrile solvent. The envelope of each spectrum is obtained by a Gaussian convolution (FWHM = 250 cm <sup>-1</sup> ) of the vibronic transitions (sticks) between the S <sub>0</sub> and S <sub>1</sub> electronic states. . . . .     | S18 |
| S12 | UV/vis absorption spectra of ADOTA computed within the (left) Franck-Condon and (right) Franck-Condon-Herzberg-Teller approximations at PBE/6-31+G* level of theory in acetonitrile solvent. The envelope of each spectrum is obtained by a Gaussian convolution (FWHM = 250 cm <sup>-1</sup> ) of the vibronic transitions (sticks) between the S <sub>0</sub> and S <sub>1</sub> electronic states. . . . .       | S19 |
| S13 | UV/vis absorption spectra of ADOTA computed within the (left) Franck-Condon and (right) Franck-Condon-Herzberg-Teller approximations at B3LYP/6-31+G* level of theory in acetonitrile solvent. The envelope of each spectrum is obtained by a Gaussian convolution (FWHM = 250 cm <sup>-1</sup> ) of the vibronic transitions (sticks) between the S <sub>0</sub> and S <sub>1</sub> electronic states. . . . .     | S20 |
| S14 | UV/vis absorption spectra of ADOTA computed within the (left) Franck-Condon and (right) Franck-Condon-Herzberg-Teller approximations at PBE0/6-31+G* level of theory in acetonitrile solvent. The envelope of each spectrum is obtained by a Gaussian convolution (FWHM = 250 cm <sup>-1</sup> ) of the vibronic transitions (sticks) between the S <sub>0</sub> and S <sub>1</sub> electronic states. . . . .      | S21 |
| S15 | UV/vis absorption spectra of ADOTA computed within the (left) Franck-Condon and (right) Franck-Condon-Herzberg-Teller approximations at M06/6-31+G* level of theory in acetonitrile solvent. The envelope of each spectrum is obtained by a Gaussian convolution (FWHM = 250 cm <sup>-1</sup> ) of the vibronic transitions (sticks) between the S <sub>0</sub> and S <sub>1</sub> electronic states. . . . .       | S22 |
| S16 | UV/vis absorption spectra of ADOTA computed within the (left) Franck-Condon and (right) Franck-Condon-Herzberg-Teller approximations at PBE0-1/3/6-31+G* level of theory in acetonitrile solvent. The envelope of each spectrum is obtained by a Gaussian convolution (FWHM = 250 cm <sup>-1</sup> ) of the vibronic transitions (sticks) between the S <sub>0</sub> and S <sub>1</sub> electronic states. . . . .  | S23 |
| S17 | UV/vis absorption spectra of ADOTA computed within the (left) Franck-Condon and (right) Franck-Condon-Herzberg-Teller approximations at BMK/6-31+G* level of theory in acetonitrile solvent. The envelope of each spectrum is obtained by a Gaussian convolution (FWHM = 250 cm <sup>-1</sup> ) of the vibronic transitions (sticks) between the S <sub>0</sub> and S <sub>1</sub> electronic states. . . . .       | S24 |
| S18 | UV/vis absorption spectra of ADOTA computed within the (left) Franck-Condon and (right) Franck-Condon-Herzberg-Teller approximations at M06-2X/6-31+G* level of theory in acetonitrile solvent. The envelope of each spectrum is obtained by a Gaussian convolution (FWHM = 250 cm <sup>-1</sup> ) of the vibronic transitions (sticks) between the S <sub>0</sub> and S <sub>1</sub> electronic states. . . . .    | S25 |
| S19 | UV/vis absorption spectra of ADOTA computed within the (left) Franck-Condon and (right) Franck-Condon-Herzberg-Teller approximations at M06-HF/6-31+G* level of theory in acetonitrile solvent. The envelope of each spectrum is obtained by a Gaussian convolution (FWHM = 250 cm <sup>-1</sup> ) of the vibronic transitions (sticks) between the S <sub>0</sub> and S <sub>1</sub> electronic states. . . . .    | S26 |
| S20 | UV/vis absorption spectra of ADOTA computed within the (left) Franck-Condon and (right) Franck-Condon-Herzberg-Teller approximations at ωB97XD/6-31+G* level of theory in acetonitrile solvent. The envelope of each spectrum is obtained by a Gaussian convolution (FWHM = 250 cm <sup>-1</sup> ) of the vibronic transitions (sticks) between the S <sub>0</sub> and S <sub>1</sub> electronic states. . . . .    | S27 |
| S21 | UV/vis absorption spectra of ADOTA computed within the (left) Franck-Condon and (right) Franck-Condon-Herzberg-Teller approximations at CAM-B3LYP/6-31+G* level of theory in acetonitrile solvent. The envelope of each spectrum is obtained by a Gaussian convolution (FWHM = 250 cm <sup>-1</sup> ) of the vibronic transitions (sticks) between the S <sub>0</sub> and S <sub>1</sub> electronic states. . . . . | S28 |

|     |                                                                                                                                                                                                                                                                                                                                                                                                                     |     |
|-----|---------------------------------------------------------------------------------------------------------------------------------------------------------------------------------------------------------------------------------------------------------------------------------------------------------------------------------------------------------------------------------------------------------------------|-----|
| S22 | UV/vis absorption spectra of DAOTA computed within the (left) Franck-Condon and (right) Franck-Condon-Herzberg-Teller approximations at SVWN5/6-31+G* level of theory in acetonitrile solvent. The envelope of each spectrum is obtained by a Gaussian convolution (FWHM = 250 cm <sup>-1</sup> ) of the vibronic transitions (sticks) between the S <sub>0</sub> and S <sub>1</sub> electronic states. . . . .     | S29 |
| S23 | UV/vis absorption spectra of DAOTA computed within the (left) Franck-Condon and (right) Franck-Condon-Herzberg-Teller approximations at PBE/6-31+G* level of theory in acetonitrile solvent. The envelope of each spectrum is obtained by a Gaussian convolution (FWHM = 250 cm <sup>-1</sup> ) of the vibronic transitions (sticks) between the S <sub>0</sub> and S <sub>1</sub> electronic states. . . . .       | S30 |
| S24 | UV/vis absorption spectra of DAOTA computed within the (left) Franck-Condon and (right) Franck-Condon-Herzberg-Teller approximations at B3LYP/6-31+G* level of theory in acetonitrile solvent. The envelope of each spectrum is obtained by a Gaussian convolution (FWHM = 250 cm <sup>-1</sup> ) of the vibronic transitions (sticks) between the S <sub>0</sub> and S <sub>1</sub> electronic states. . . . .     | S31 |
| S25 | UV/vis absorption spectra of DAOTA computed within the (left) Franck-Condon and (right) Franck-Condon-Herzberg-Teller approximations at PBE0/6-31+G* level of theory in acetonitrile solvent. The envelope of each spectrum is obtained by a Gaussian convolution (FWHM = 250 cm <sup>-1</sup> ) of the vibronic transitions (sticks) between the S <sub>0</sub> and S <sub>1</sub> electronic states. . . . .      | S32 |
| S26 | UV/vis absorption spectra of DAOTA computed within the (left) Franck-Condon and (right) Franck-Condon-Herzberg-Teller approximations at M06/6-31+G* level of theory in acetonitrile solvent. The envelope of each spectrum is obtained by a Gaussian convolution (FWHM = 250 cm <sup>-1</sup> ) of the vibronic transitions (sticks) between the S <sub>0</sub> and S <sub>1</sub> electronic states. . . . .       | S33 |
| S27 | UV/vis absorption spectra of DAOTA computed within the (left) Franck-Condon and (right) Franck-Condon-Herzberg-Teller approximations at BMK/6-31+G* level of theory in acetonitrile solvent. The envelope of each spectrum is obtained by a Gaussian convolution (FWHM = 250 cm <sup>-1</sup> ) of the vibronic transitions (sticks) between the S <sub>0</sub> and S <sub>1</sub> electronic states. . . . .       | S34 |
| S28 | UV/vis absorption spectra of DAOTA computed within the (left) Franck-Condon and (right) Franck-Condon-Herzberg-Teller approximations at M06-2X/6-31+G* level of theory in acetonitrile solvent. The envelope of each spectrum is obtained by a Gaussian convolution (FWHM = 250 cm <sup>-1</sup> ) of the vibronic transitions (sticks) between the S <sub>0</sub> and S <sub>1</sub> electronic states. . . . .    | S35 |
| S29 | UV/vis absorption spectra of DAOTA computed within the (left) Franck-Condon and (right) Franck-Condon-Herzberg-Teller approximations at M06-HF/6-31+G* level of theory in acetonitrile solvent. The envelope of each spectrum is obtained by a Gaussian convolution (FWHM = 250 cm <sup>-1</sup> ) of the vibronic transitions (sticks) between the S <sub>0</sub> and S <sub>1</sub> electronic states. . . . .    | S36 |
| S30 | UV/vis absorption spectra of DAOTA computed within the (left) Franck-Condon and (right) Franck-Condon-Herzberg-Teller approximations at ωB97XD/6-31+G* level of theory in acetonitrile solvent. The envelope of each spectrum is obtained by a Gaussian convolution (FWHM = 250 cm <sup>-1</sup> ) of the vibronic transitions (sticks) between the S <sub>0</sub> and S <sub>1</sub> electronic states. . . . .    | S37 |
| S31 | UV/vis absorption spectra of DAOTA computed within the (left) Franck-Condon and (right) Franck-Condon-Herzberg-Teller approximations at CAM-B3LYP/6-31+G* level of theory in acetonitrile solvent. The envelope of each spectrum is obtained by a Gaussian convolution (FWHM = 250 cm <sup>-1</sup> ) of the vibronic transitions (sticks) between the S <sub>0</sub> and S <sub>1</sub> electronic states. . . . . | S38 |
| S32 | UV/vis absorption spectra of TOTA computed within the (left) Franck-Condon and (right) Franck-Condon-Herzberg-Teller approximations at SVWN5/6-31+G* level of theory in acetonitrile solvent. The envelope of each spectrum is obtained by a Gaussian convolution (FWHM = 250 cm <sup>-1</sup> ) of the vibronic transitions (sticks) between the S <sub>0</sub> and S <sub>1</sub> electronic states. . . . .      | S39 |

|     |                                                                                                                                                                                                                                                                                                                                                                                                                    |     |
|-----|--------------------------------------------------------------------------------------------------------------------------------------------------------------------------------------------------------------------------------------------------------------------------------------------------------------------------------------------------------------------------------------------------------------------|-----|
| S33 | UV/vis absorption spectra of TOTA computed within the (left) Franck-Condon and (right) Franck-Condon-Herzberg-Teller approximations at PBE/6-31+G* level of theory in acetonitrile solvent. The envelope of each spectrum is obtained by a Gaussian convolution (FWHM = 250 cm <sup>-1</sup> ) of the vibronic transitions (sticks) between the S <sub>0</sub> and S <sub>1</sub> electronic states. . . . .       | S40 |
| S34 | UV/vis absorption spectra of TOTA computed within the (left) Franck-Condon and (right) Franck-Condon-Herzberg-Teller approximations at B3LYP/6-31+G* level of theory in acetonitrile solvent. The envelope of each spectrum is obtained by a Gaussian convolution (FWHM = 250 cm <sup>-1</sup> ) of the vibronic transitions (sticks) between the S <sub>0</sub> and S <sub>1</sub> electronic states. . . . .     | S41 |
| S35 | UV/vis absorption spectra of TOTA computed within the (left) Franck-Condon and (right) Franck-Condon-Herzberg-Teller approximations at PBE0/6-31+G* level of theory in acetonitrile solvent. The envelope of each spectrum is obtained by a Gaussian convolution (FWHM = 250 cm <sup>-1</sup> ) of the vibronic transitions (sticks) between the S <sub>0</sub> and S <sub>1</sub> electronic states. . . . .      | S42 |
| S36 | UV/vis absorption spectra of TOTA computed within the (left) Franck-Condon and (right) Franck-Condon-Herzberg-Teller approximations at M06/6-31+G* level of theory in acetonitrile solvent. The envelope of each spectrum is obtained by a Gaussian convolution (FWHM = 250 cm <sup>-1</sup> ) of the vibronic transitions (sticks) between the S <sub>0</sub> and S <sub>1</sub> electronic states. . . . .       | S43 |
| S37 | UV/vis absorption spectra of TOTA computed within the (left) Franck-Condon and (right) Franck-Condon-Herzberg-Teller approximations at BMK/6-31+G* level of theory in acetonitrile solvent. The envelope of each spectrum is obtained by a Gaussian convolution (FWHM = 250 cm <sup>-1</sup> ) of the vibronic transitions (sticks) between the S <sub>0</sub> and S <sub>1</sub> electronic states. . . . .       | S44 |
| S38 | UV/vis absorption spectra of TOTA computed within the (left) Franck-Condon and (right) Franck-Condon-Herzberg-Teller approximations at M06-2X/6-31+G* level of theory in acetonitrile solvent. The envelope of each spectrum is obtained by a Gaussian convolution (FWHM = 250 cm <sup>-1</sup> ) of the vibronic transitions (sticks) between the S <sub>0</sub> and S <sub>1</sub> electronic states. . . . .    | S45 |
| S39 | UV/vis absorption spectra of TOTA computed within the (left) Franck-Condon and (right) Franck-Condon-Herzberg-Teller approximations at M06-HF/6-31+G* level of theory in acetonitrile solvent. The envelope of each spectrum is obtained by a Gaussian convolution (FWHM = 250 cm <sup>-1</sup> ) of the vibronic transitions (sticks) between the S <sub>0</sub> and S <sub>1</sub> electronic states. . . . .    | S46 |
| S40 | UV/vis absorption spectra of TOTA computed within the (left) Franck-Condon and (right) Franck-Condon-Herzberg-Teller approximations at ωB97XD/6-31+G* level of theory in acetonitrile solvent. The envelope of each spectrum is obtained by a Gaussian convolution (FWHM = 250 cm <sup>-1</sup> ) of the vibronic transitions (sticks) between the S <sub>0</sub> and S <sub>1</sub> electronic states. . . . .    | S47 |
| S41 | UV/vis absorption spectra of TOTA computed within the (left) Franck-Condon and (right) Franck-Condon-Herzberg-Teller approximations at CAM-B3LYP/6-31+G* level of theory in acetonitrile solvent. The envelope of each spectrum is obtained by a Gaussian convolution (FWHM = 250 cm <sup>-1</sup> ) of the vibronic transitions (sticks) between the S <sub>0</sub> and S <sub>1</sub> electronic states. . . . . | S48 |
| S42 | UV/vis absorption spectra of TATA computed within the (left) Franck-Condon and (right) Franck-Condon-Herzberg-Teller approximations at PBE0/STO-3G level of theory in acetonitrile solvent. The envelope of each spectrum is obtained by a Gaussian convolution (FWHM = 250 cm <sup>-1</sup> ) of the vibronic transitions (sticks) between the S <sub>0</sub> and S <sub>1</sub> electronic states. . . . .       | S49 |
| S43 | UV/vis absorption spectra of TATA computed within the (left) Franck-Condon and (right) Franck-Condon-Herzberg-Teller approximations at PBE0/6-31G level of theory in acetonitrile solvent. The envelope of each spectrum is obtained by a Gaussian convolution (FWHM = 250 cm <sup>-1</sup> ) of the vibronic transitions (sticks) between the S <sub>0</sub> and S <sub>1</sub> electronic states. . . . .        | S50 |

|     |                                                                                                                                                                                                                                                                                                                                                                                                                         |     |
|-----|-------------------------------------------------------------------------------------------------------------------------------------------------------------------------------------------------------------------------------------------------------------------------------------------------------------------------------------------------------------------------------------------------------------------------|-----|
| S44 | UV/vis absorption spectra of TATA computed within the (left) Franck-Condon and (right) Franck-Condon-Herzberg-Teller approximations at PBE0/6-31+G* level of theory in acetonitrile solvent. The envelope of each spectrum is obtained by a Gaussian convolution (FWHM = 250 cm <sup>-1</sup> ) of the vibronic transitions (sticks) between the S <sub>0</sub> and S <sub>1</sub> electronic states. . . . .           | S51 |
| S45 | UV/vis absorption spectra of TATA computed within the (left) Franck-Condon and (right) Franck-Condon-Herzberg-Teller approximations at PBE0/6-31++G** level of theory in acetonitrile solvent. The envelope of each spectrum is obtained by a Gaussian convolution (FWHM = 250 cm <sup>-1</sup> ) of the vibronic transitions (sticks) between the S <sub>0</sub> and S <sub>1</sub> electronic states. . . . .         | S52 |
| S46 | UV/vis absorption spectra of TATA computed within the (left) Franck-Condon and (right) Franck-Condon-Herzberg-Teller approximations at PBE0/6-311G level of theory in acetonitrile solvent. The envelope of each spectrum is obtained by a Gaussian convolution (FWHM = 250 cm <sup>-1</sup> ) of the vibronic transitions (sticks) between the S <sub>0</sub> and S <sub>1</sub> electronic states. . . . .            | S53 |
| S47 | UV/vis absorption spectra of TATA computed within the (left) Franck-Condon and (right) Franck-Condon-Herzberg-Teller approximations at PBE0/6-311+G* level of theory in acetonitrile solvent. The envelope of each spectrum is obtained by a Gaussian convolution (FWHM = 250 cm <sup>-1</sup> ) of the vibronic transitions (sticks) between the S <sub>0</sub> and S <sub>1</sub> electronic states. . . . .          | S54 |
| S48 | UV/vis absorption spectra of TATA computed within the (left) Franck-Condon and (right) Franck-Condon-Herzberg-Teller approximations at PBE0/6-311++G** level of theory in acetonitrile solvent. The envelope of each spectrum is obtained by a Gaussian convolution (FWHM = 250 cm <sup>-1</sup> ) of the vibronic transitions (sticks) between the S <sub>0</sub> and S <sub>1</sub> electronic states. . . . .        | S55 |
| S49 | UV/vis absorption spectra of TATA computed within the (left) Franck-Condon and (right) Franck-Condon-Herzberg-Teller approximations at PBE0/6-311++G(3df,3pd) level of theory in acetonitrile solvent. The envelope of each spectrum is obtained by a Gaussian convolution (FWHM = 250 cm <sup>-1</sup> ) of the vibronic transitions (sticks) between the S <sub>0</sub> and S <sub>1</sub> electronic states. . . . . | S56 |
| S50 | UV/vis absorption spectra of TATA computed within the (left) Franck-Condon and (right) Franck-Condon-Herzberg-Teller approximations at PBE0/6-31+G* level of theory in gaz solvent. The envelope of each spectrum is obtained by a Gaussian convolution (FWHM = 250 cm <sup>-1</sup> ) of the vibronic transitions (sticks) between the S <sub>0</sub> and S <sub>1</sub> electronic states. . . . .                    | S57 |
| S51 | UV/vis absorption spectra of TATA computed within the (left) Franck-Condon and (right) Franck-Condon-Herzberg-Teller approximations at PBE0/6-31+G* level of theory in <i>n</i> -octane solvent. The envelope of each spectrum is obtained by a Gaussian convolution (FWHM = 250 cm <sup>-1</sup> ) of the vibronic transitions (sticks) between the S <sub>0</sub> and S <sub>1</sub> electronic states. . . . .       | S58 |
| S52 | UV/vis absorption spectra of TATA computed within the (left) Franck-Condon and (right) Franck-Condon-Herzberg-Teller approximations at PBE0/6-31+G* level of theory in acetonitrile solvent. The envelope of each spectrum is obtained by a Gaussian convolution (FWHM = 250 cm <sup>-1</sup> ) of the vibronic transitions (sticks) between the S <sub>0</sub> and S <sub>1</sub> electronic states. . . . .           | S59 |
| S53 | UV/vis absorption spectra of TATA computed within the (left) Franck-Condon and (right) Franck-Condon-Herzberg-Teller approximations at PBE0/6-31+G* level of theory in 1-hexanol solvent. The envelope of each spectrum is obtained by a Gaussian convolution (FWHM = 250 cm <sup>-1</sup> ) of the vibronic transitions (sticks) between the S <sub>0</sub> and S <sub>1</sub> electronic states. . . . .              | S60 |
| S54 | UV/vis absorption spectra of TATA computed within the (left) Franck-Condon and (right) Franck-Condon-Herzberg-Teller approximations at PBE0/6-31+G* level of theory in dimethylsulfoxide solvent. The envelope of each spectrum is obtained by a Gaussian convolution (FWHM = 250 cm <sup>-1</sup> ) of the vibronic transitions (sticks) between the S <sub>0</sub> and S <sub>1</sub> electronic states. . . . .      | S61 |

|     |                                                                                                                                                                                                                                                                                                                                                                                      |     |
|-----|--------------------------------------------------------------------------------------------------------------------------------------------------------------------------------------------------------------------------------------------------------------------------------------------------------------------------------------------------------------------------------------|-----|
| S55 | UV/vis absorption spectra of TATA computed within the (left) Franck-Condon and (right) Franck-Condon-Herzberg-Teller approximations at PBE0/6-31+G* level of theory in water solvent. The envelope of each spectrum is obtained by a Gaussian convolution (FWHM = 250 cm <sup>-1</sup> ) of the vibronic transitions (sticks) between the $S_0$ and $S_1$ electronic states. . . . . | S62 |
|-----|--------------------------------------------------------------------------------------------------------------------------------------------------------------------------------------------------------------------------------------------------------------------------------------------------------------------------------------------------------------------------------------|-----|

# Density-Functional Benchmark

## 1 TATA

### 1.1 SVWN5

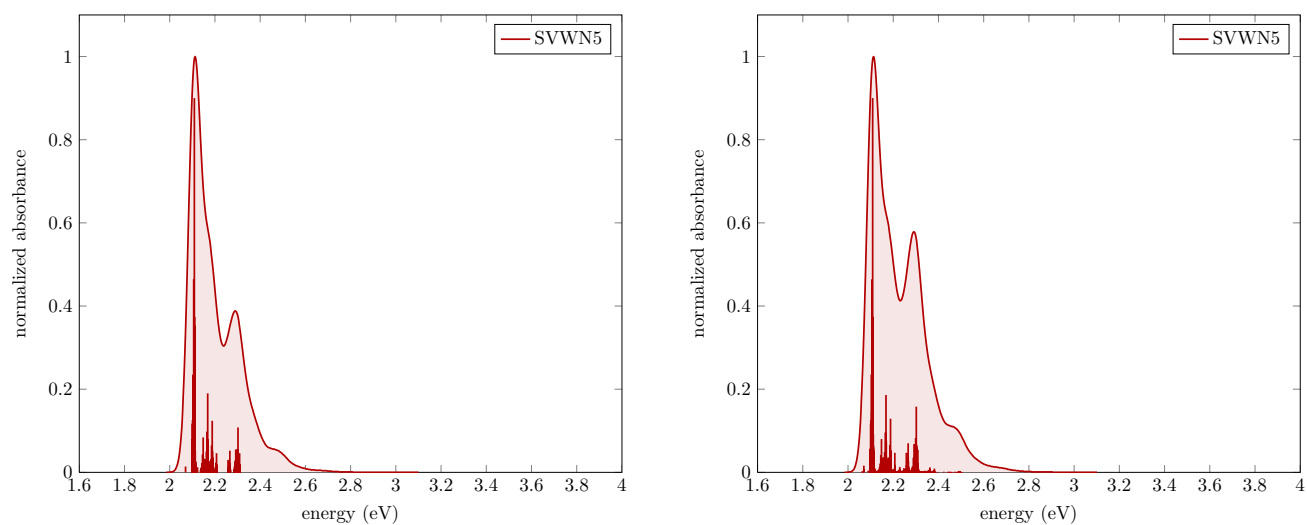

**Fig. S1** UV/vis absorption spectra of TATA computed within the (left) Franck-Condon and (right) Franck-Condon-Herzberg-Teller approximations at SVWN5/6-31+G\* level of theory in acetonitrile solvent. The envelope of each spectrum is obtained by a Gaussian convolution (FWHM = 250 cm<sup>-1</sup>) of the vibronic transitions (sticks) between the  $S_0$  and  $S_1$  electronic states.



## 1.2 PBE

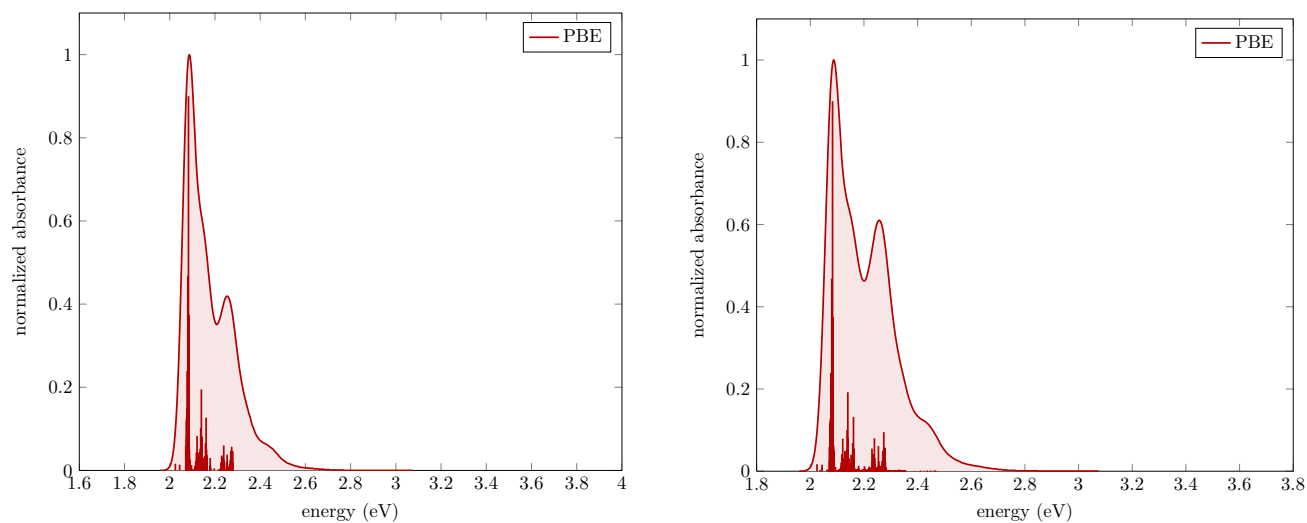

**Fig. S2** UV/vis absorption spectra of TATA computed within the (left) Franck-Condon and (right) Franck-Condon-Herzberg-Teller approximations at PBE/6-31+G\* level of theory in acetonitrile solvent. The envelope of each spectrum is obtained by a Gaussian convolution (FWHM = 250 cm<sup>-1</sup>) of the vibronic transitions (sticks) between the  $S_0$  and  $S_1$  electronic states.

### 1.3 B3LYP

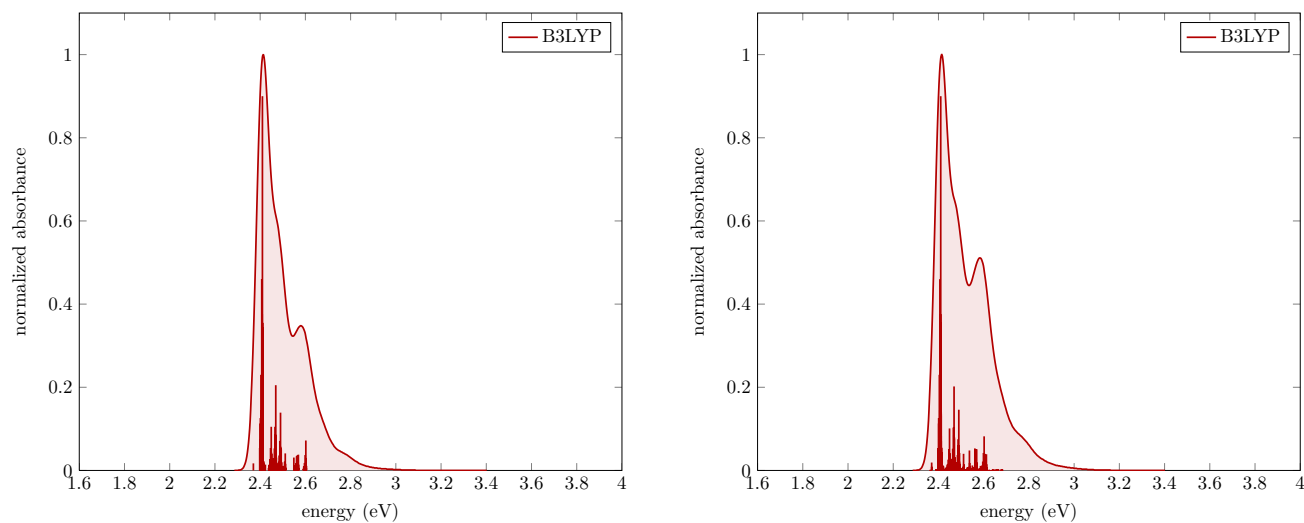

**Fig. S3** UV/vis absorption spectra of TATA computed within the (left) Franck-Condon and (right) Franck-Condon-Herzberg-Teller approximations at B3LYP/6-31+G\* level of theory in acetonitrile solvent. The envelope of each spectrum is obtained by a Gaussian convolution (FWHM = 250 cm<sup>-1</sup>) of the vibronic transitions (sticks) between the  $S_0$  and  $S_1$  electronic states.

## 1.4 PBE0

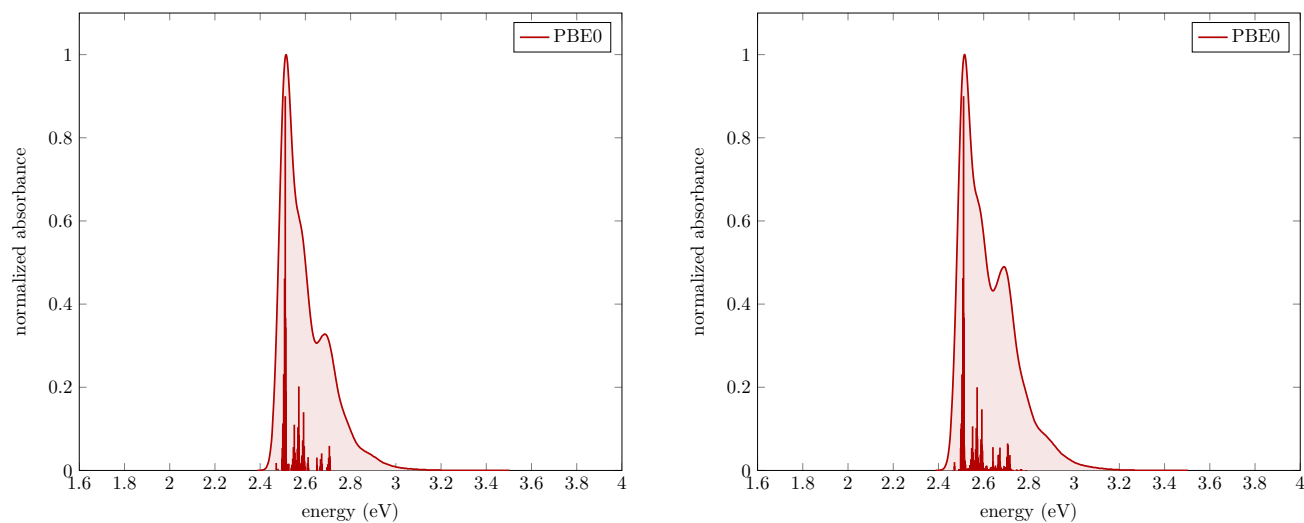

**Fig. S4** UV/vis absorption spectra of TATA computed within the (left) Franck-Condon and (right) Franck-Condon-Herzberg-Teller approximations at PBE0/6-31+G\* level of theory in acetonitrile solvent. The envelope of each spectrum is obtained by a Gaussian convolution (FWHM = 250 cm<sup>-1</sup>) of the vibronic transitions (sticks) between the  $S_0$  and  $S_1$  electronic states.

## 1.5 M06

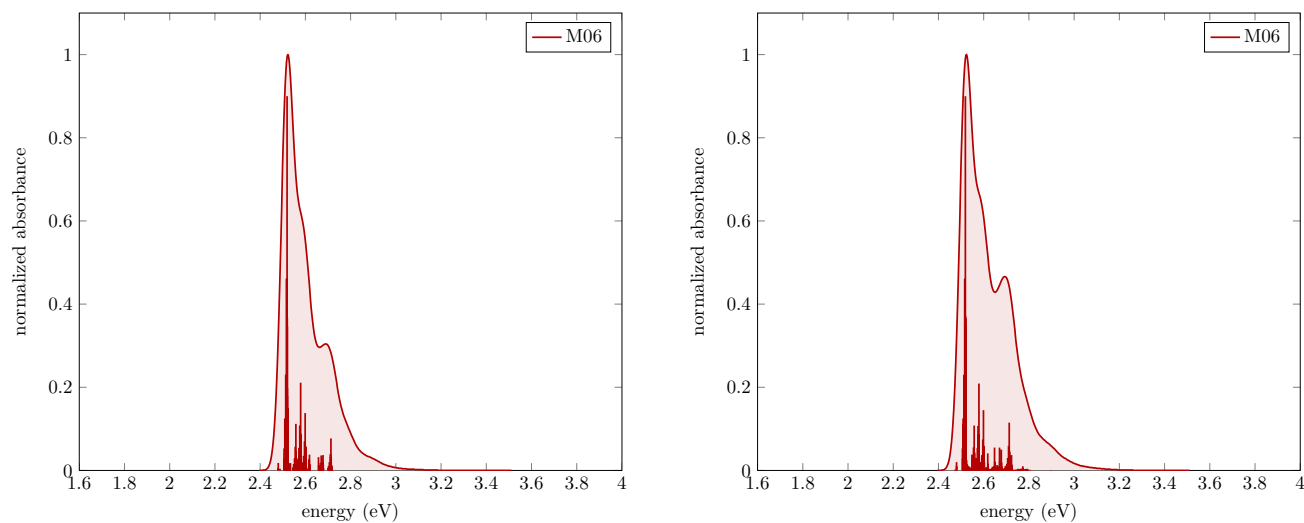

**Fig. S5** UV/vis absorption spectra of TATA computed within the (left) Franck-Condon and (right) Franck-Condon-Herzberg-Teller approximations at M06/6-31+G\* level of theory in acetonitrile solvent. The envelope of each spectrum is obtained by a Gaussian convolution (FWHM = 250 cm<sup>-1</sup>) of the vibronic transitions (sticks) between the  $S_0$  and  $S_1$  electronic states.

## 1.6 BMK

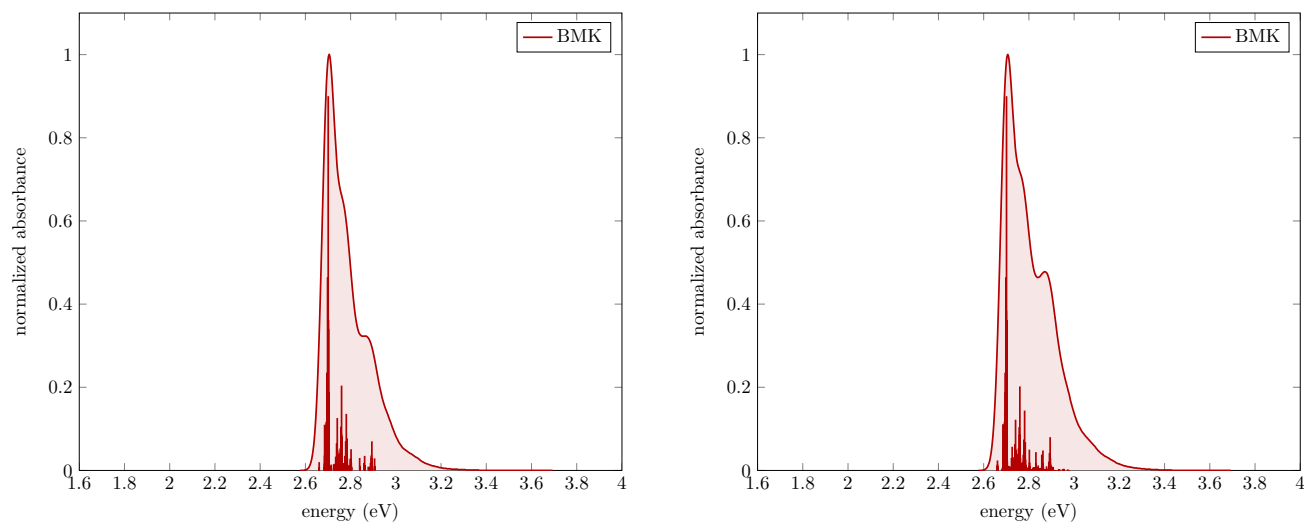

**Fig. S6** UV/vis absorption spectra of TATA computed within the (left) Franck-Condon and (right) Franck-Condon-Herzberg-Teller approximations at BMK/6-31+G\* level of theory in acetonitrile solvent. The envelope of each spectrum is obtained by a Gaussian convolution (FWHM = 250 cm<sup>-1</sup>) of the vibronic transitions (sticks) between the  $S_0$  and  $S_1$  electronic states.

## 1.7 M06-2X

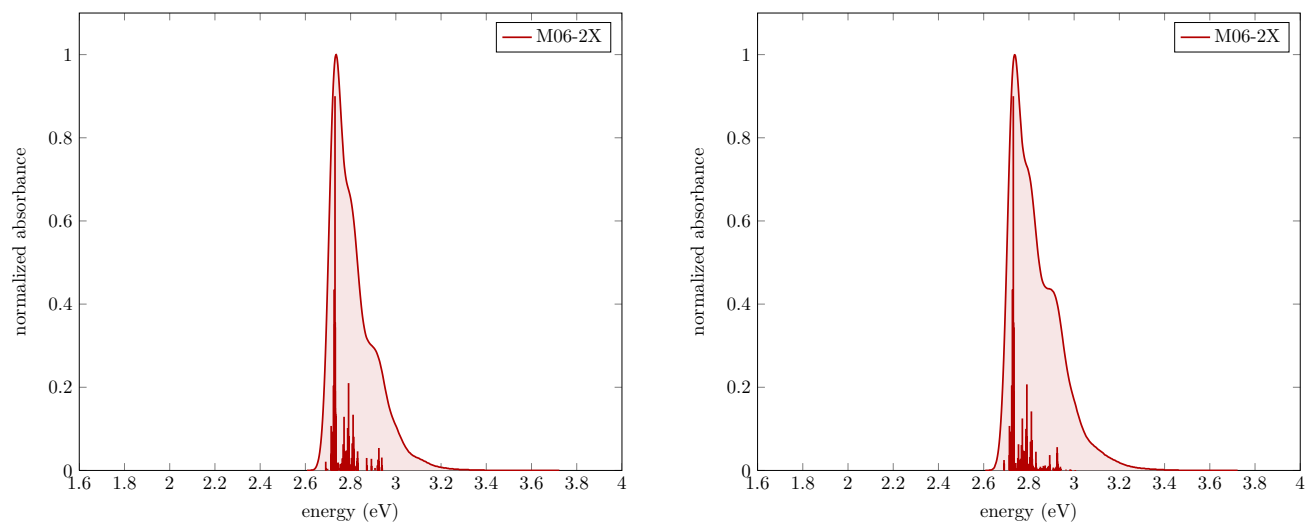

**Fig. S7** UV/vis absorption spectra of TATA computed within the (left) Franck-Condon and (right) Franck-Condon-Herzberg-Teller approximations at M06-2X/6-31+G\* level of theory in acetonitrile solvent. The envelope of each spectrum is obtained by a Gaussian convolution (FWHM =  $250\text{ cm}^{-1}$ ) of the vibronic transitions (sticks) between the  $S_0$  and  $S_1$  electronic states.

## 1.8 M06-HF

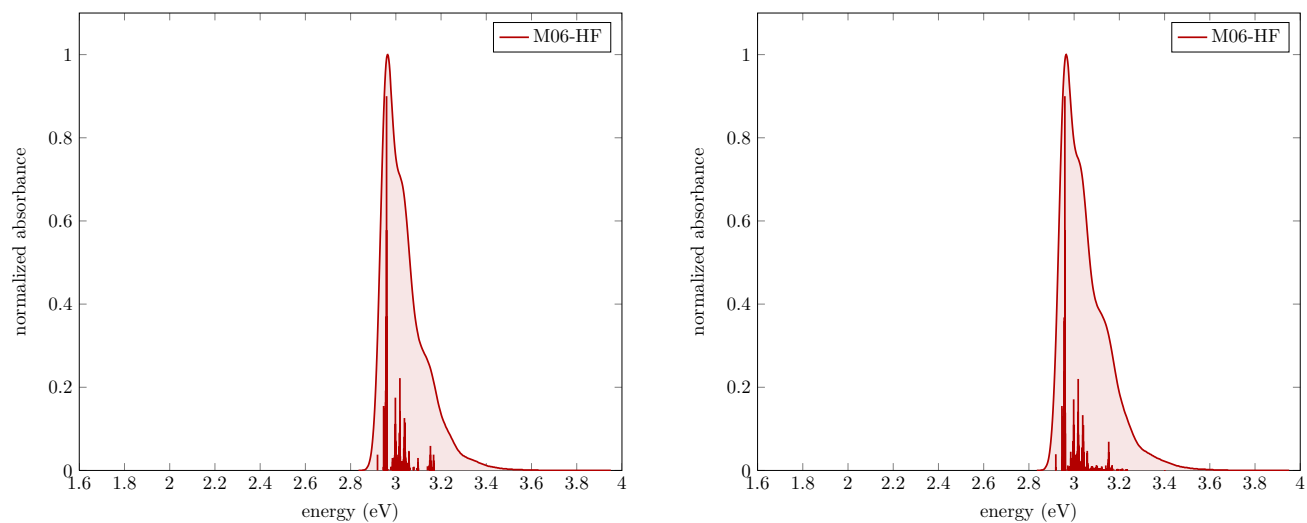

**Fig. S8** UV/vis absorption spectra of TATA computed within the (left) Franck-Condon and (right) Franck-Condon-Herzberg-Teller approximations at M06-HF/6-31+G\* level of theory in acetonitrile solvent. The envelope of each spectrum is obtained by a Gaussian convolution (FWHM = 250 cm<sup>-1</sup>) of the vibronic transitions (sticks) between the  $S_0$  and  $S_1$  electronic states.

## 1.9 $\omega$ B97XD

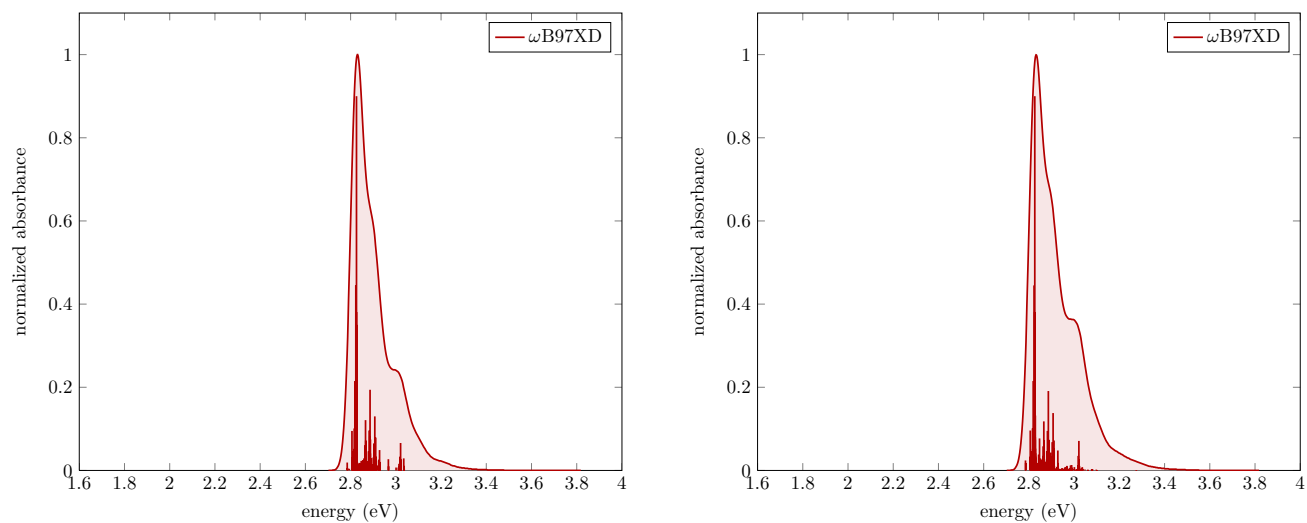

**Fig. S9** UV/vis absorption spectra of TATA computed within the (left) Franck-Condon and (right) Franck-Condon-Herzberg-Teller approximations at  $\omega$ B97XD/6-31+G\* level of theory in acetonitrile solvent. The envelope of each spectrum is obtained by a Gaussian convolution (FWHM = 250 cm<sup>-1</sup>) of the vibronic transitions (sticks) between the  $S_0$  and  $S_1$  electronic states.



## 1.10 CAM-B3LYP

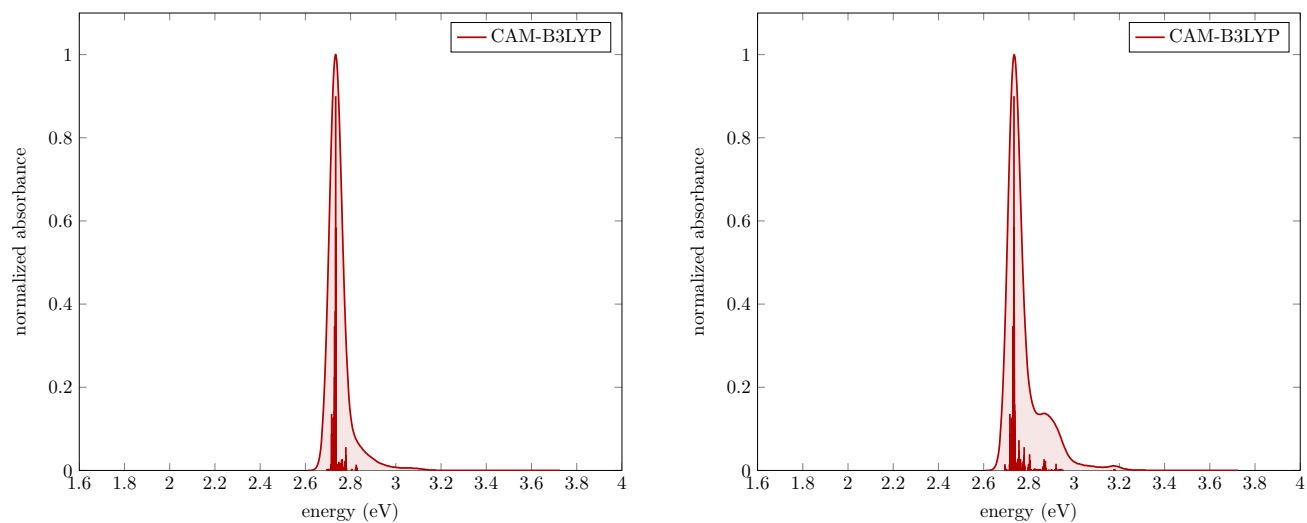

**Fig. S10** UV/vis absorption spectra of TATA computed within the (left) Franck-Condon and (right) Franck-Condon-Herzberg-Teller approximations at CAM-B3LYP/6-31+G\* level of theory in acetonitrile solvent. The envelope of each spectrum is obtained by a Gaussian convolution (FWHM = 250 cm<sup>-1</sup>) of the vibronic transitions (sticks) between the  $S_0$  and  $S_1$  electronic states.

## 2 ADOTA

### 2.1 SVWN5

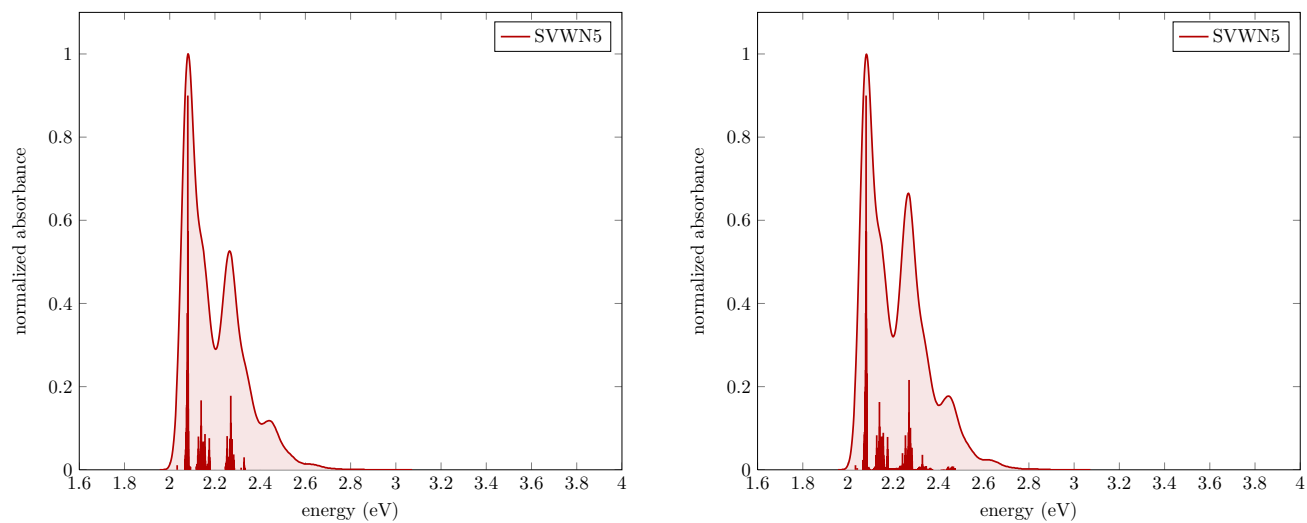

**Fig. S11** UV/vis absorption spectra of ADOTA computed within the (left) Franck-Condon and (right) Franck-Condon-Herzberg-Teller approximations at SVWN5/6-31+G<sup>\*</sup> level of theory in acetonitrile solvent. The envelope of each spectrum is obtained by a Gaussian convolution (FWHM = 250 cm<sup>-1</sup>) of the vibronic transitions (sticks) between the  $S_0$  and  $S_1$  electronic states.

## 2.2 PBE

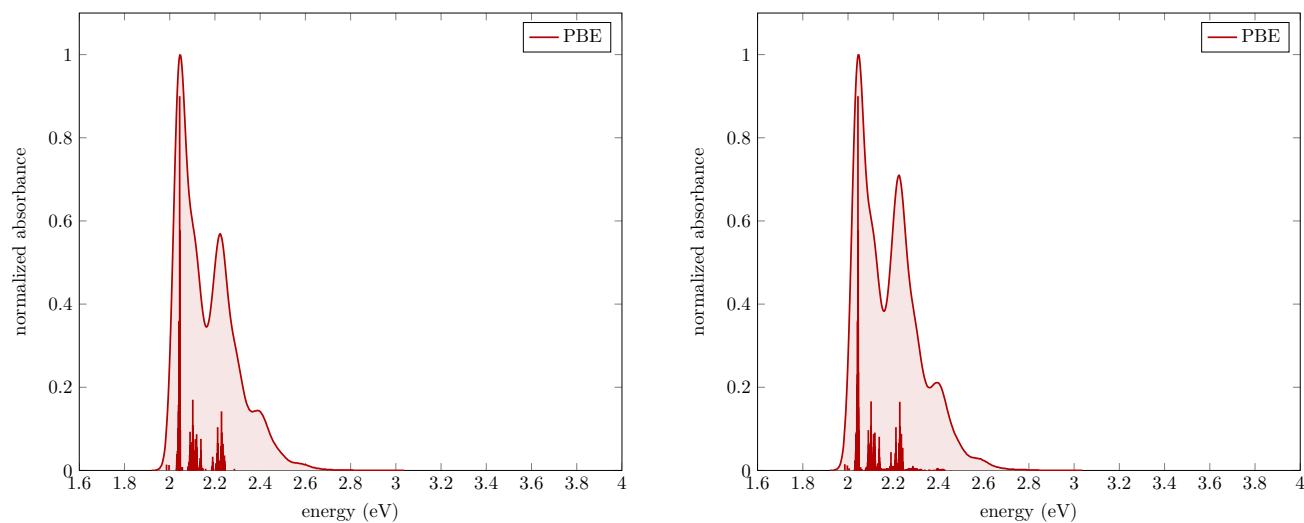

**Fig. S12** UV/vis absorption spectra of ADOTA computed within the (left) Franck-Condon and (right) Franck-Condon-Herzberg-Teller approximations at PBE/6-31+G\* level of theory in acetonitrile solvent. The envelope of each spectrum is obtained by a Gaussian convolution (FWHM = 250 cm<sup>-1</sup>) of the vibronic transitions (sticks) between the  $S_0$  and  $S_1$  electronic states.

## 2.3 B3LYP

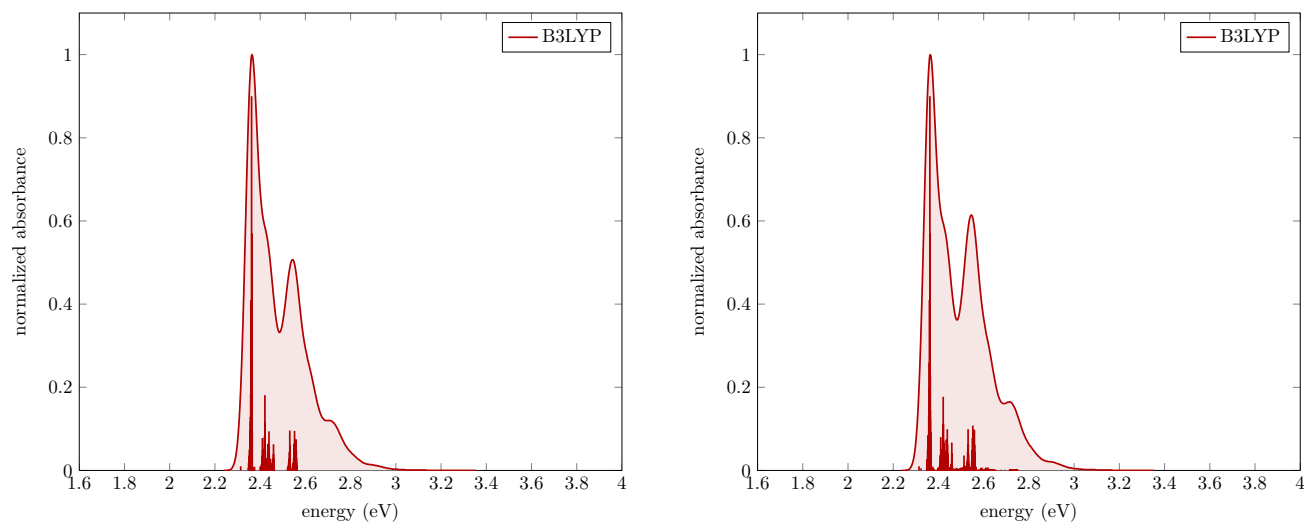

**Fig. S13** UV/vis absorption spectra of ADOTA computed within the (left) Franck-Condon and (right) Franck-Condon-Herzberg-Teller approximations at B3LYP/6-31+G\* level of theory in acetonitrile solvent. The envelope of each spectrum is obtained by a Gaussian convolution (FWHM = 250 cm<sup>-1</sup>) of the vibronic transitions (sticks) between the  $S_0$  and  $S_1$  electronic states.

## 2.4 PBE0

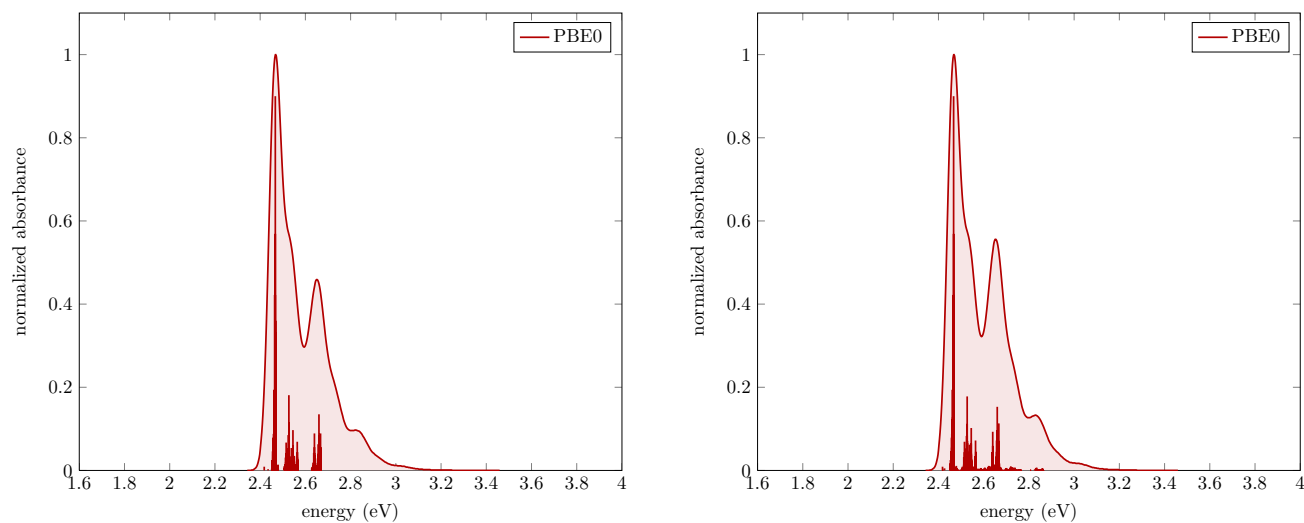

**Fig. S14** UV/vis absorption spectra of ADOTA computed within the (left) Franck-Condon and (right) Franck-Condon-Herzberg-Teller approximations at PBE0/6-31+G\* level of theory in acetonitrile solvent. The envelope of each spectrum is obtained by a Gaussian convolution (FWHM = 250 cm<sup>-1</sup>) of the vibronic transitions (sticks) between the  $S_0$  and  $S_1$  electronic states.

## 2.5 M06

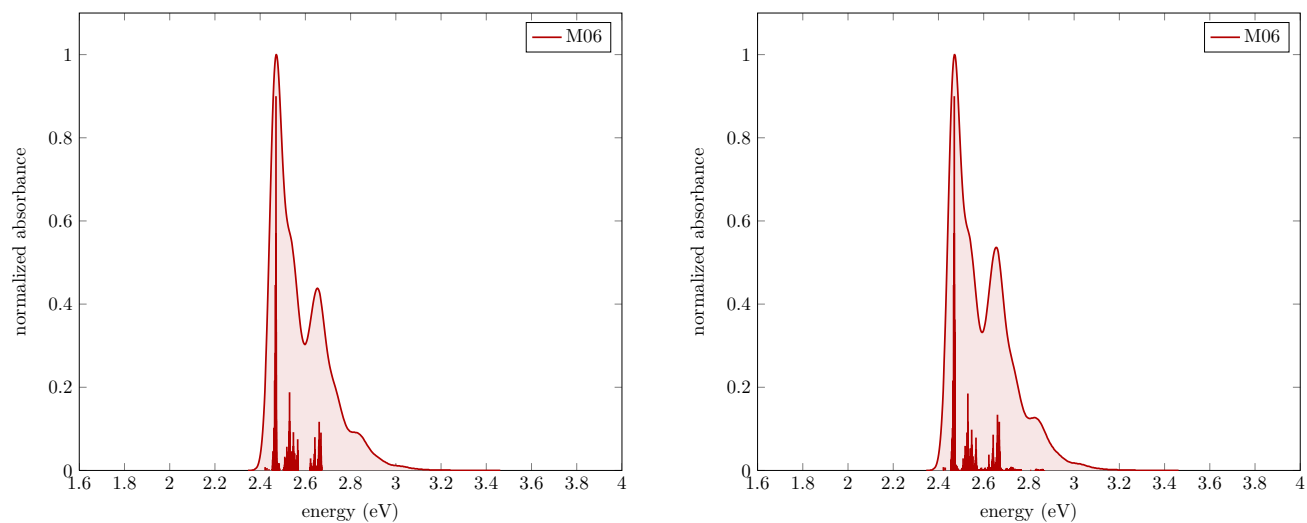

**Fig. S15** UV/vis absorption spectra of ADOTA computed within the (left) Franck-Condon and (right) Franck-Condon-Herzberg-Teller approximations at M06/6-31+G\* level of theory in acetonitrile solvent. The envelope of each spectrum is obtained by a Gaussian convolution (FWHM = 250 cm<sup>-1</sup>) of the vibronic transitions (sticks) between the  $S_0$  and  $S_1$  electronic states.

## 2.6 PBE0-1/3

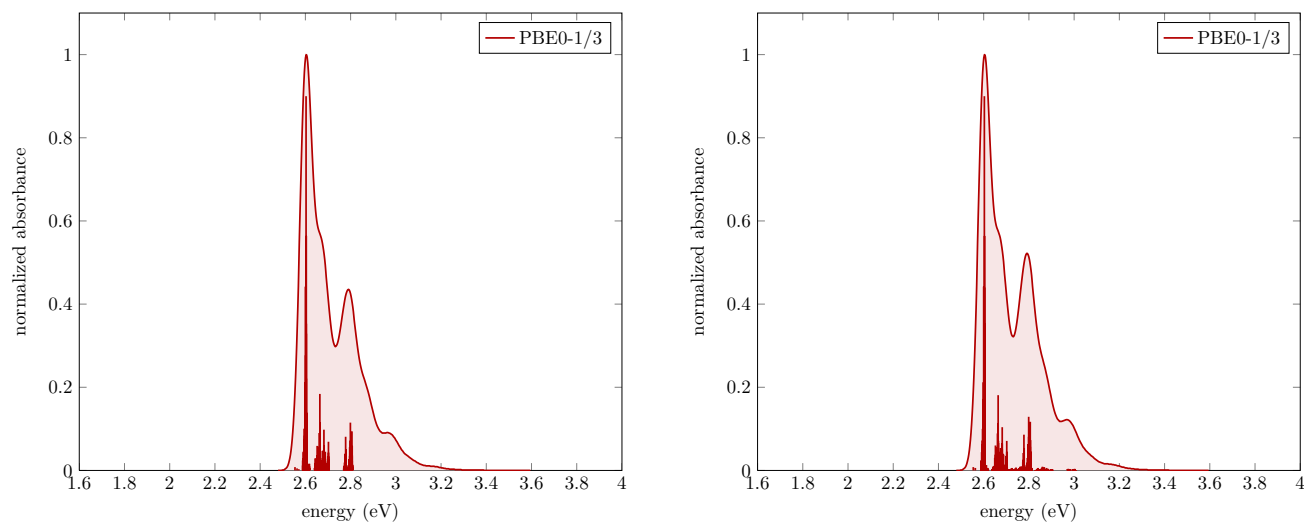

**Fig. S16** UV/vis absorption spectra of ADOTA computed within the (left) Franck-Condon and (right) Franck-Condon-Herzberg-Teller approximations at PBE0-1/3/6-31+G\* level of theory in acetonitrile solvent. The envelope of each spectrum is obtained by a Gaussian convolution (FWHM = 250 cm<sup>-1</sup>) of the vibronic transitions (sticks) between the  $S_0$  and  $S_1$  electronic states.

## 2.7 BMK

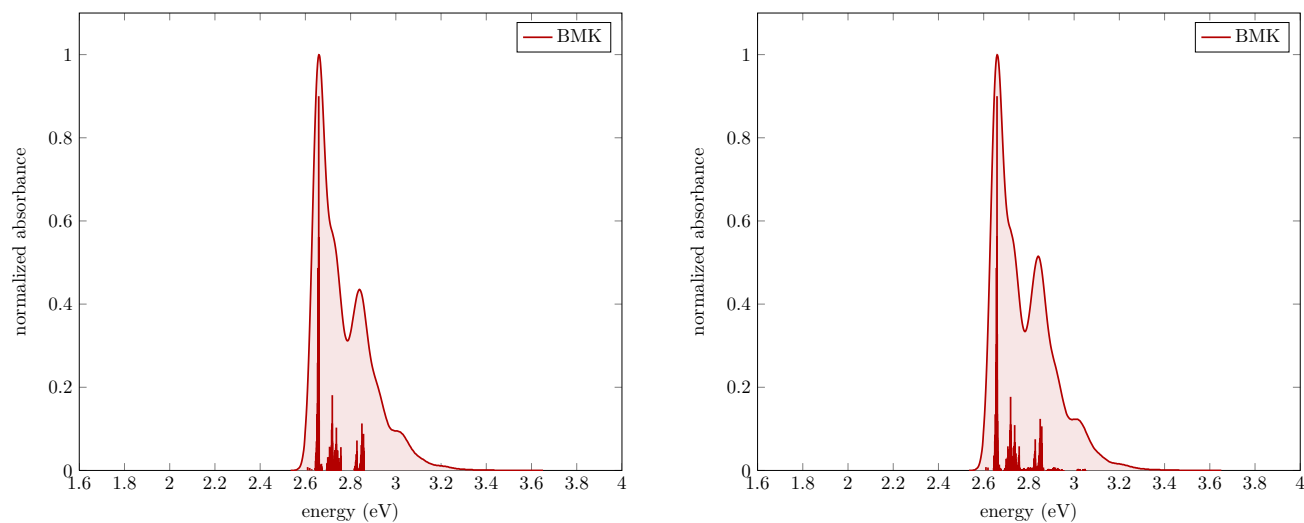

**Fig. S17** UV/vis absorption spectra of ADOTA computed within the (left) Franck-Condon and (right) Franck-Condon-Herzberg-Teller approximations at BMK/6-31+G\* level of theory in acetonitrile solvent. The envelope of each spectrum is obtained by a Gaussian convolution (FWHM = 250 cm<sup>-1</sup>) of the vibronic transitions (sticks) between the  $S_0$  and  $S_1$  electronic states.



## 2.8 M06-2X

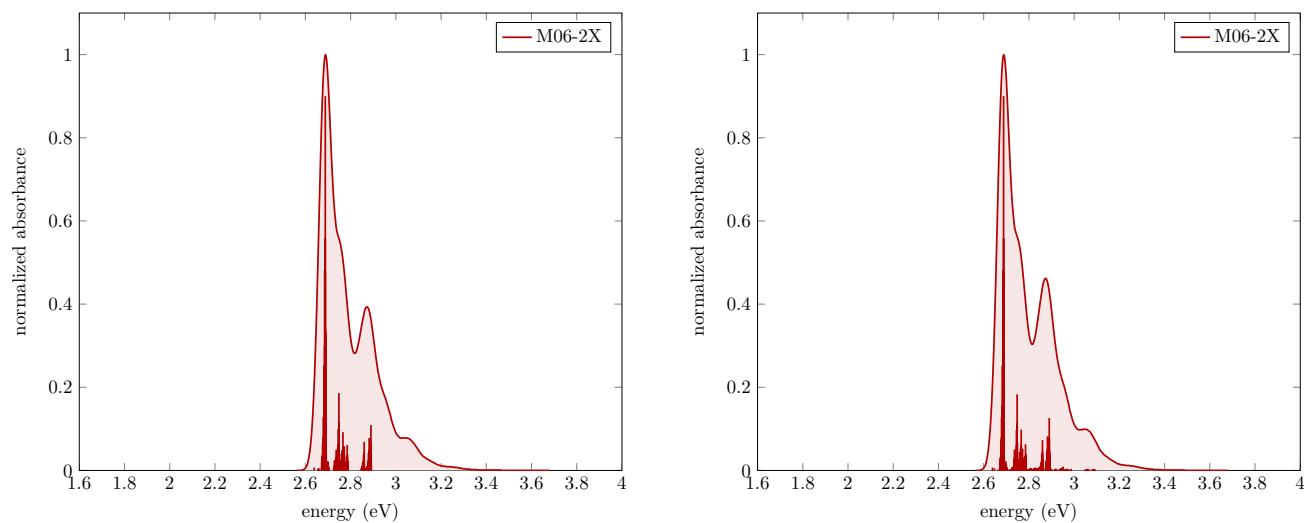

**Fig. S18** UV/vis absorption spectra of ADOTA computed within the (left) Franck-Condon and (right) Franck-Condon-Herzberg-Teller approximations at M06-2X/6-31+G\* level of theory in acetonitrile solvent. The envelope of each spectrum is obtained by a Gaussian convolution (FWHM = 250 cm<sup>-1</sup>) of the vibronic transitions (sticks) between the  $S_0$  and  $S_1$  electronic states.

## 2.9 M06-HF

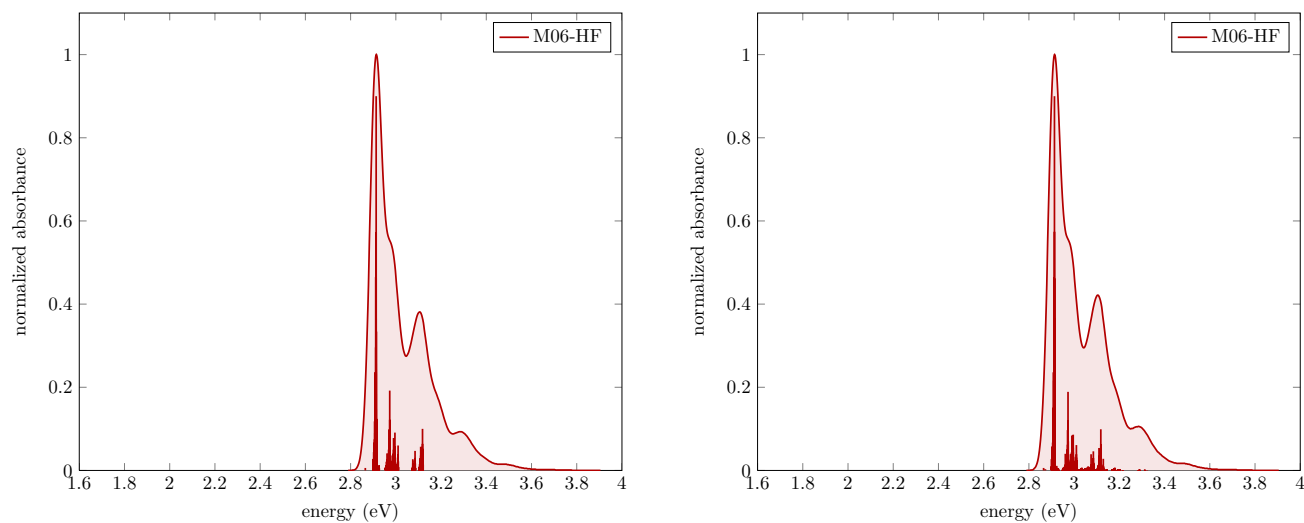

**Fig. S19** UV/vis absorption spectra of ADOTA computed within the (left) Franck-Condon and (right) Franck-Condon-Herzberg-Teller approximations at M06-HF/6-31+G\* level of theory in acetonitrile solvent. The envelope of each spectrum is obtained by a Gaussian convolution (FWHM = 250 cm<sup>-1</sup>) of the vibronic transitions (sticks) between the  $S_0$  and  $S_1$  electronic states.

## 2.10 $\omega$ B97XD

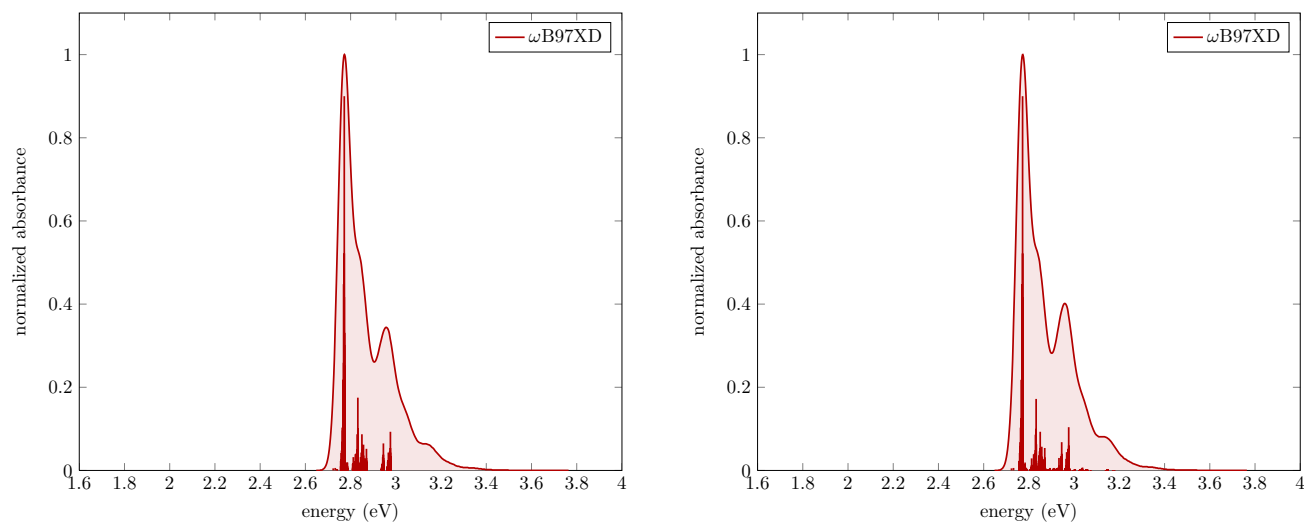

**Fig. S20** UV/vis absorption spectra of ADOTA computed within the (left) Franck-Condon and (right) Franck-Condon-Herzberg-Teller approximations at  $\omega$ B97XD/6-31+G\* level of theory in acetonitrile solvent. The envelope of each spectrum is obtained by a Gaussian convolution (FWHM = 250 cm<sup>-1</sup>) of the vibronic transitions (sticks) between the  $S_0$  and  $S_1$  electronic states.

## 2.11 CAM-B3LYP

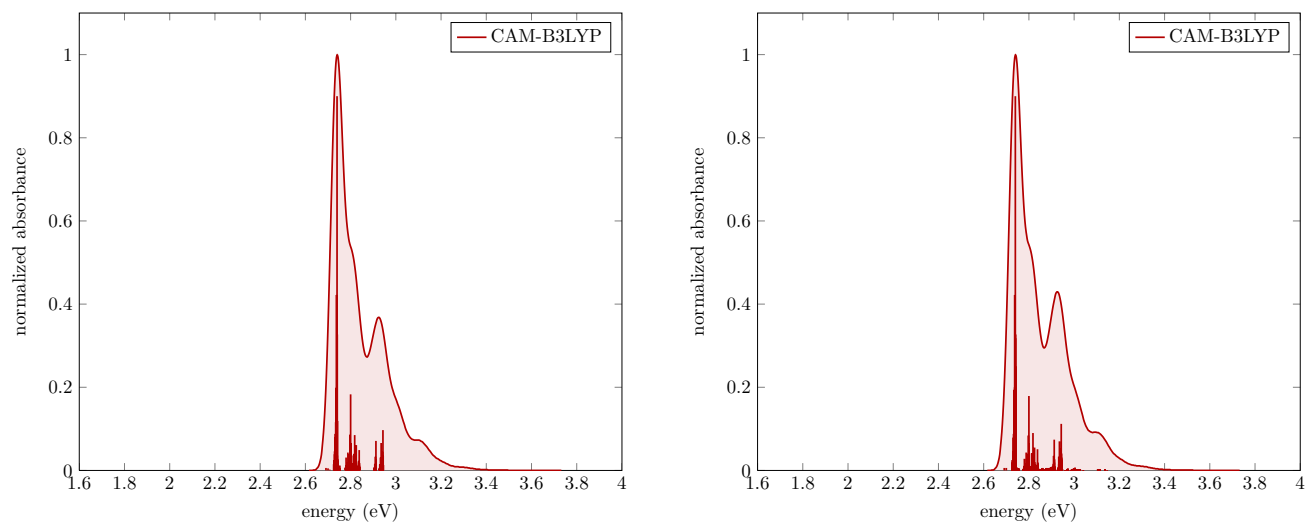

**Fig. S21** UV/vis absorption spectra of ADOTA computed within the (left) Franck-Condon and (right) Franck-Condon-Herzberg-Teller approximations at CAM-B3LYP/6-31+G\* level of theory in acetonitrile solvent. The envelope of each spectrum is obtained by a Gaussian convolution (FWHM = 250 cm<sup>-1</sup>) of the vibronic transitions (sticks) between the  $S_0$  and  $S_1$  electronic states.

### 3 DAOTA

#### 3.1 SVWN5

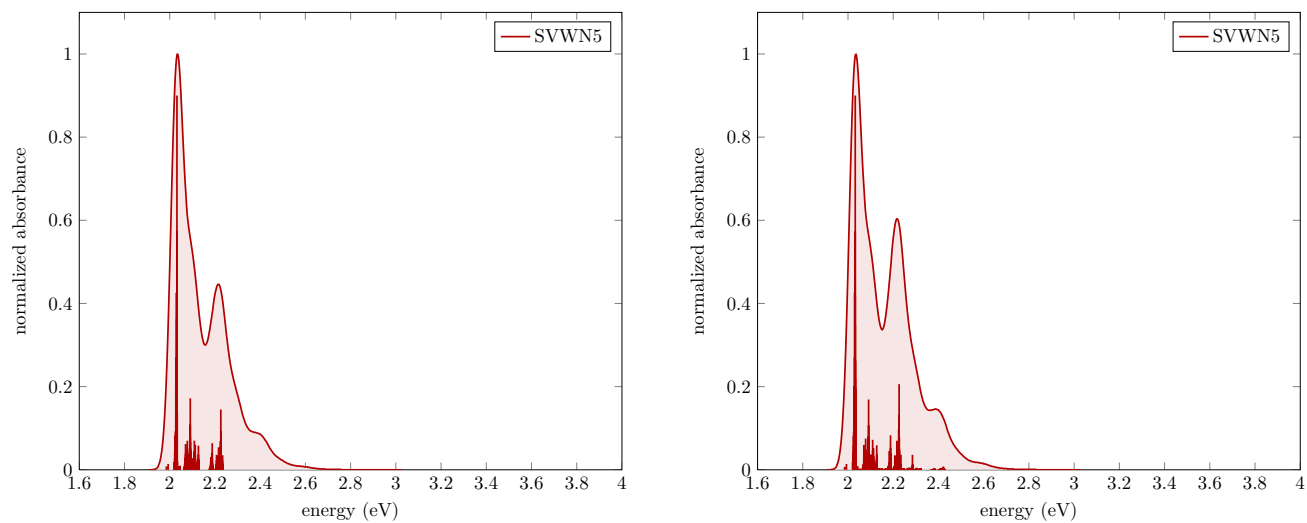

**Fig. S22** UV/vis absorption spectra of DAOTA computed within the (left) Franck-Condon and (right) Franck-Condon-Herzberg-Teller approximations at SVWN5/6-31+G<sup>\*</sup> level of theory in acetonitrile solvent. The envelope of each spectrum is obtained by a Gaussian convolution (FWHM = 250 cm<sup>-1</sup>) of the vibronic transitions (sticks) between the  $S_0$  and  $S_1$  electronic states.

## 3.2 PBE

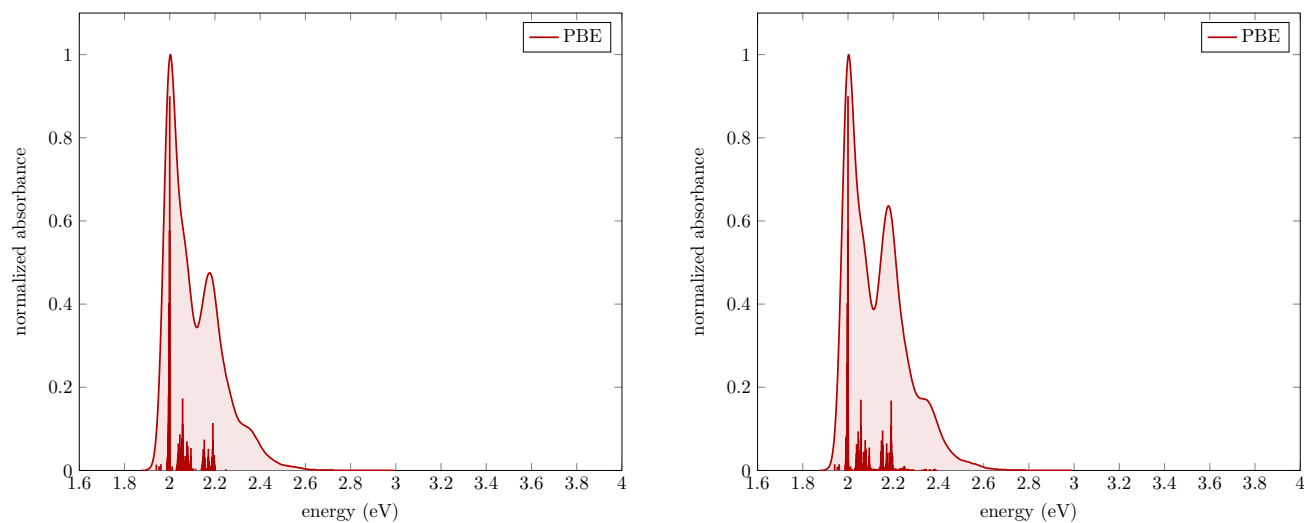

**Fig. S23** UV/vis absorption spectra of DAOTA computed within the (left) Franck-Condon and (right) Franck-Condon-Herzberg-Teller approximations at PBE/6-31+G\* level of theory in acetonitrile solvent. The envelope of each spectrum is obtained by a Gaussian convolution (FWHM = 250 cm<sup>-1</sup>) of the vibronic transitions (sticks) between the  $S_0$  and  $S_1$  electronic states.

### 3.3 B3LYP

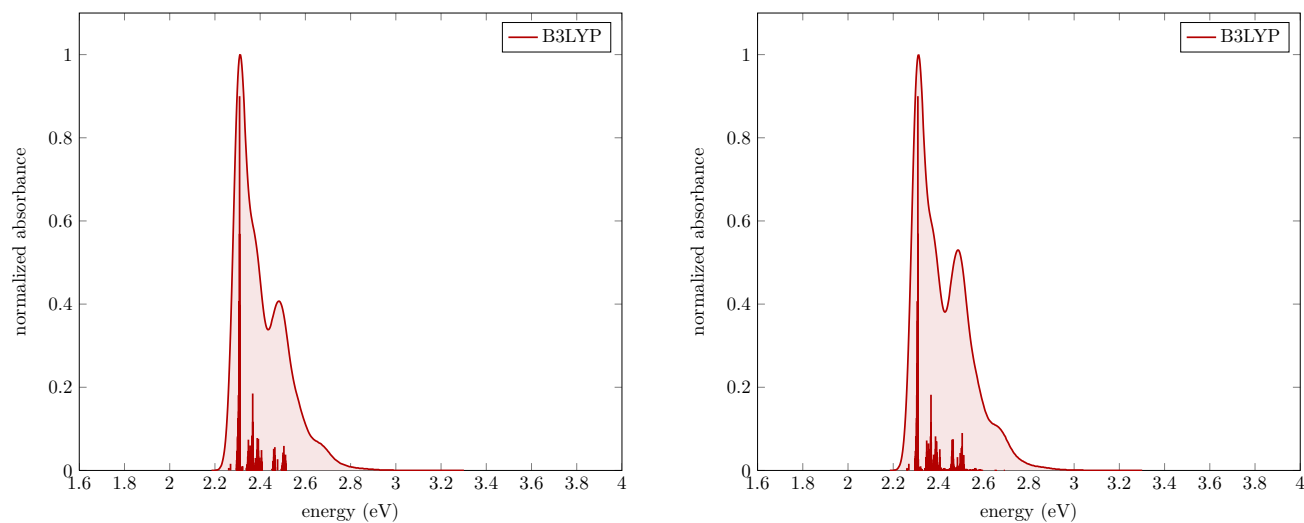

**Fig. S24** UV/vis absorption spectra of DAOTA computed within the (left) Franck-Condon and (right) Franck-Condon-Herzberg-Teller approximations at B3LYP/6-31+G\* level of theory in acetonitrile solvent. The envelope of each spectrum is obtained by a Gaussian convolution (FWHM = 250 cm<sup>-1</sup>) of the vibronic transitions (sticks) between the  $S_0$  and  $S_1$  electronic states.

### 3.4 PBE0

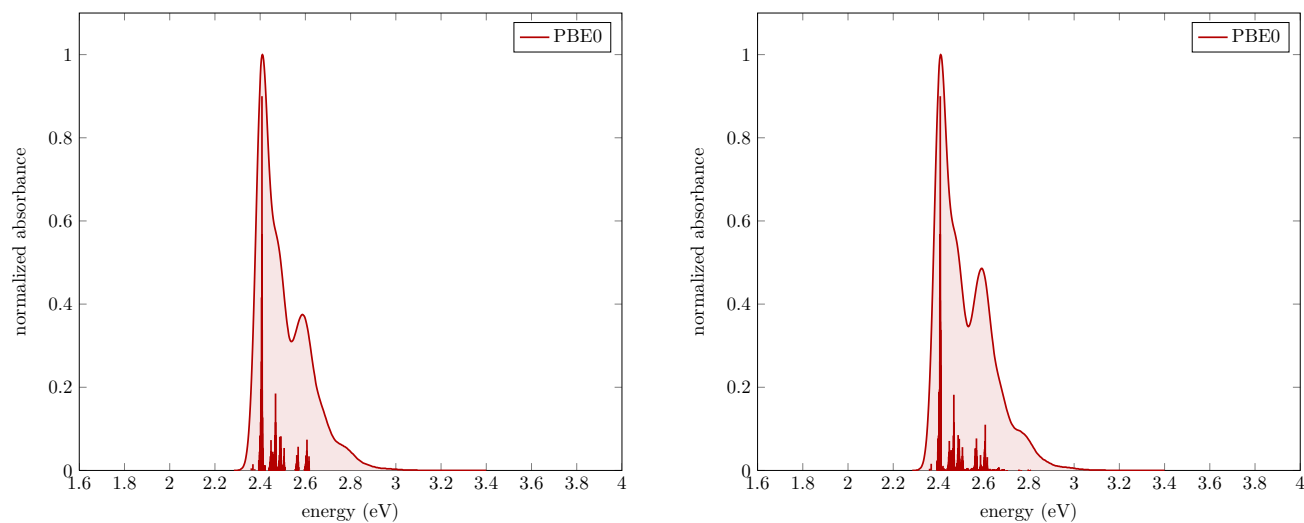

**Fig. S25** UV/vis absorption spectra of DAOTA computed within the (left) Franck-Condon and (right) Franck-Condon-Herzberg-Teller approximations at PBE0/6-31+G\* level of theory in acetonitrile solvent. The envelope of each spectrum is obtained by a Gaussian convolution (FWHM = 250 cm<sup>-1</sup>) of the vibronic transitions (sticks) between the  $S_0$  and  $S_1$  electronic states.



### 3.5 M06

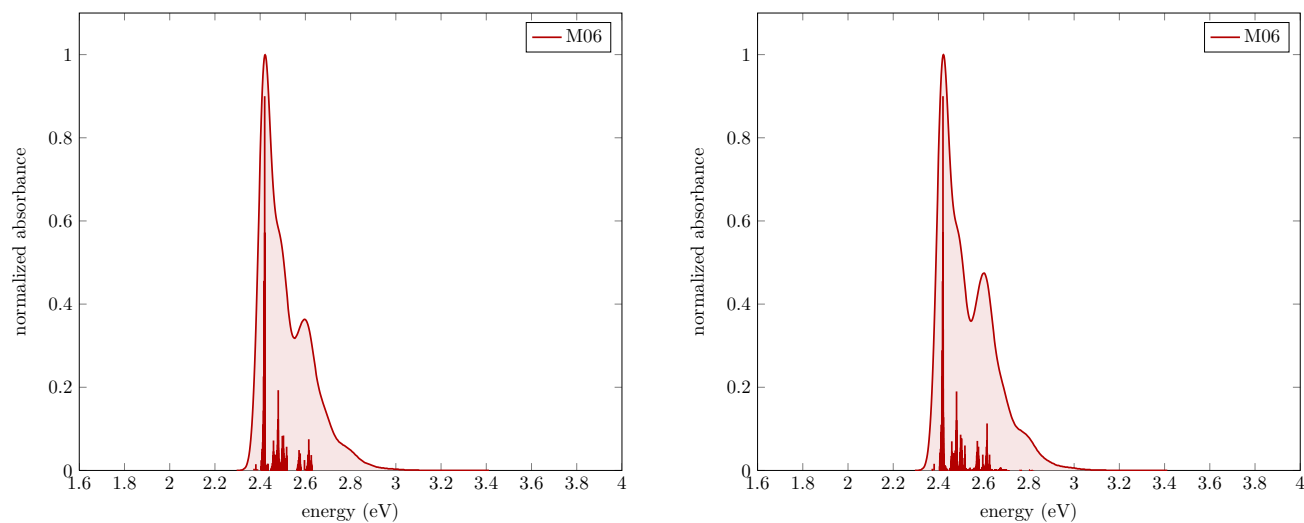

**Fig. S26** UV/vis absorption spectra of DAOTA computed within the (left) Franck-Condon and (right) Franck-Condon-Herzberg-Teller approximations at M06/6-31+G\* level of theory in acetonitrile solvent. The envelope of each spectrum is obtained by a Gaussian convolution (FWHM = 250 cm<sup>-1</sup>) of the vibronic transitions (sticks) between the  $S_0$  and  $S_1$  electronic states.

### 3.6 BMK

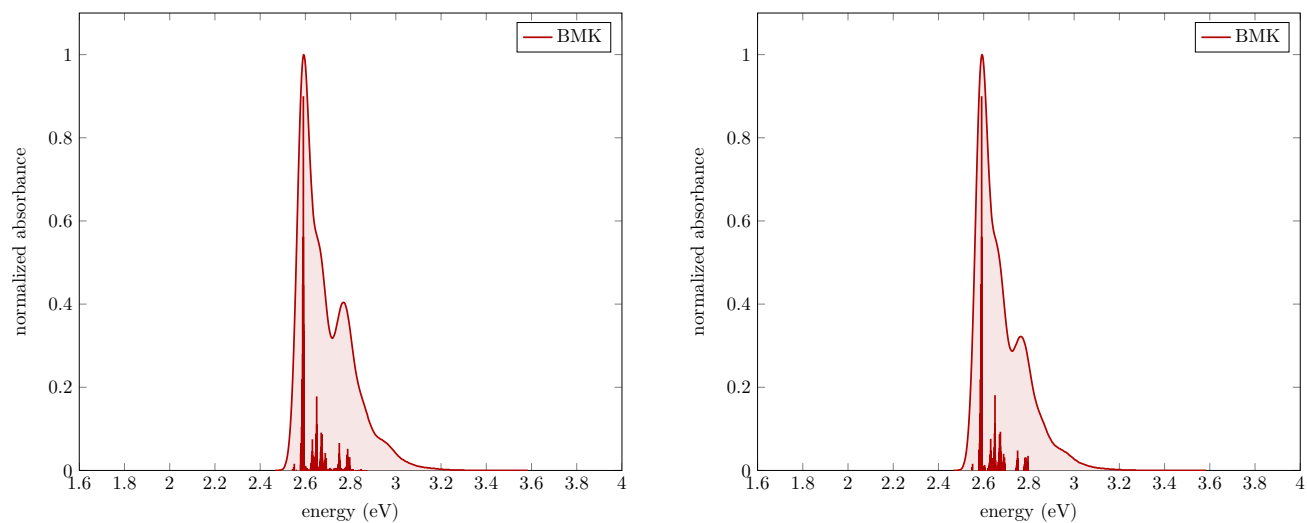

**Fig. S27** UV/vis absorption spectra of DAOTA computed within the (left) Franck-Condon and (right) Franck-Condon-Herzberg-Teller approximations at BMK/6-31+G\* level of theory in acetonitrile solvent. The envelope of each spectrum is obtained by a Gaussian convolution (FWHM = 250 cm<sup>-1</sup>) of the vibronic transitions (sticks) between the  $S_0$  and  $S_1$  electronic states.

### 3.7 M06-2X

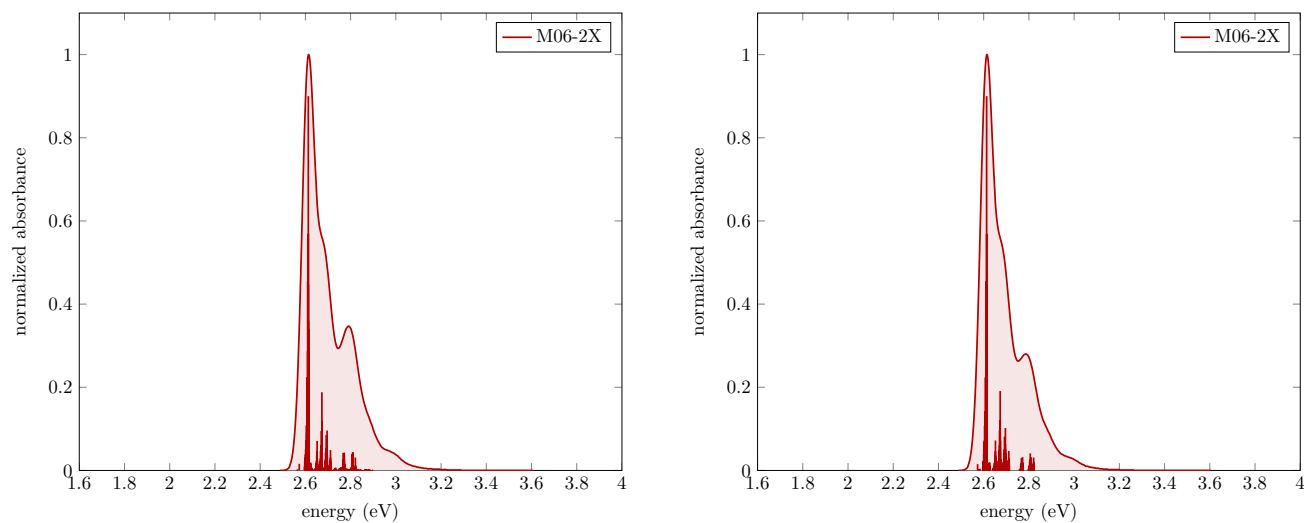

**Fig. S28** UV/vis absorption spectra of DAOTA computed within the (left) Franck-Condon and (right) Franck-Condon-Herzberg-Teller approximations at M06-2X/6-31+G\* level of theory in acetonitrile solvent. The envelope of each spectrum is obtained by a Gaussian convolution (FWHM = 250 cm<sup>-1</sup>) of the vibronic transitions (sticks) between the  $S_0$  and  $S_1$  electronic states.

### 3.8 M06-HF

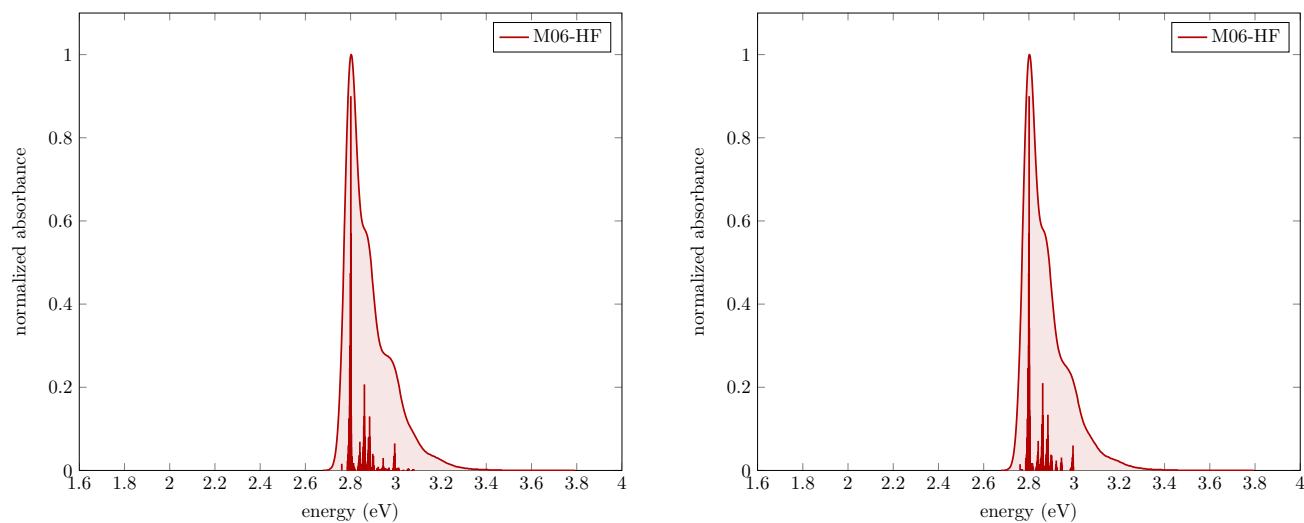

**Fig. S29** UV/vis absorption spectra of DAOTA computed within the (left) Franck-Condon and (right) Franck-Condon-Herzberg-Teller approximations at M06-HF/6-31+G\* level of theory in acetonitrile solvent. The envelope of each spectrum is obtained by a Gaussian convolution (FWHM = 250 cm<sup>-1</sup>) of the vibronic transitions (sticks) between the  $S_0$  and  $S_1$  electronic states.

### 3.9 $\omega$ B97XD

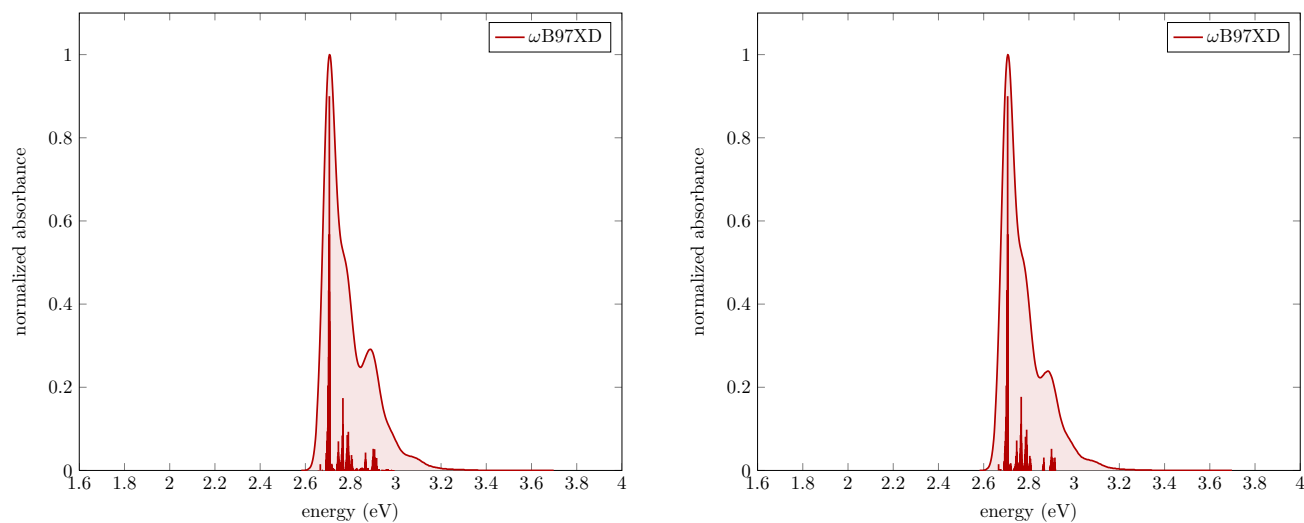

**Fig. S30** UV/vis absorption spectra of DAOTA computed within the (left) Franck-Condon and (right) Franck-Condon-Herzberg-Teller approximations at  $\omega$ B97XD/6-31+G\* level of theory in acetonitrile solvent. The envelope of each spectrum is obtained by a Gaussian convolution (FWHM = 250 cm<sup>-1</sup>) of the vibronic transitions (sticks) between the  $S_0$  and  $S_1$  electronic states.

### 3.10 CAM-B3LYP

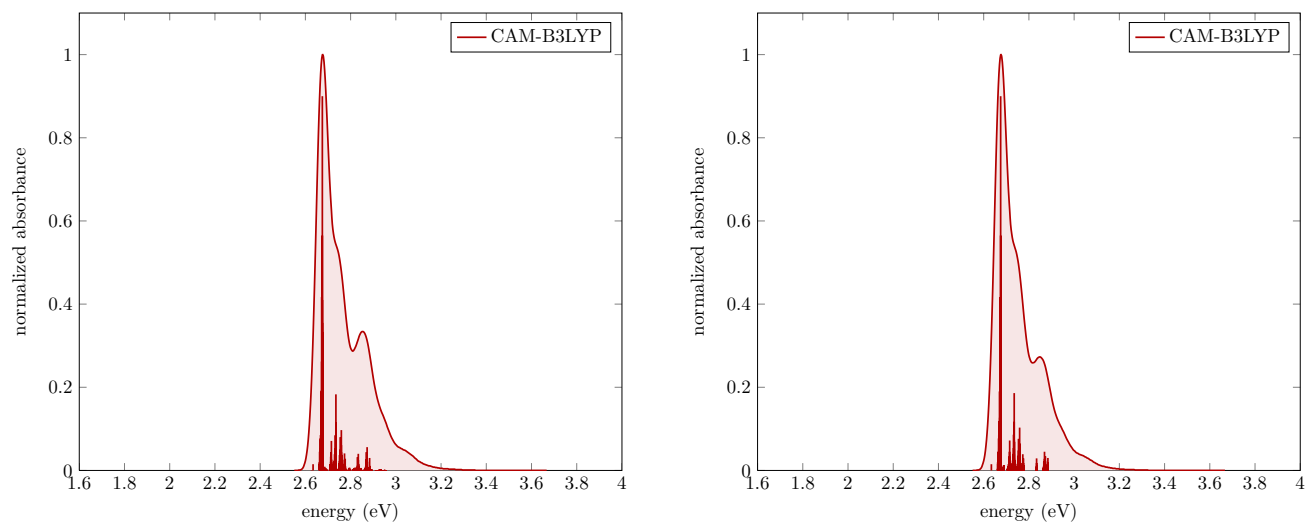

**Fig. S31** UV/vis absorption spectra of DAOTA computed within the (left) Franck-Condon and (right) Franck-Condon-Herzberg-Teller approximations at CAM-B3LYP/6-31+G\* level of theory in acetonitrile solvent. The envelope of each spectrum is obtained by a Gaussian convolution (FWHM = 250 cm<sup>-1</sup>) of the vibronic transitions (sticks) between the  $S_0$  and  $S_1$  electronic states.

## 4 TOTA

### 4.1 SVWN5

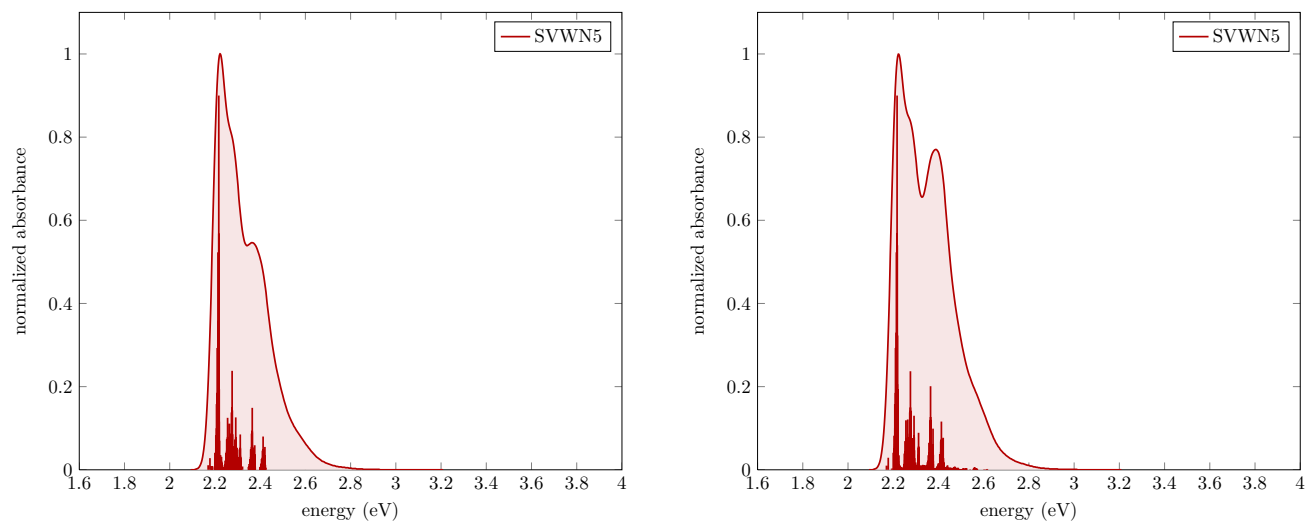

**Fig. S32** UV/vis absorption spectra of TOTA computed within the (left) Franck-Condon and (right) Franck-Condon-Herzberg-Teller approximations at SVWN5/6-31+G\* level of theory in acetonitrile solvent. The envelope of each spectrum is obtained by a Gaussian convolution (FWHM = 250 cm<sup>-1</sup>) of the vibronic transitions (sticks) between the  $S_0$  and  $S_1$  electronic states.

## 4.2 PBE

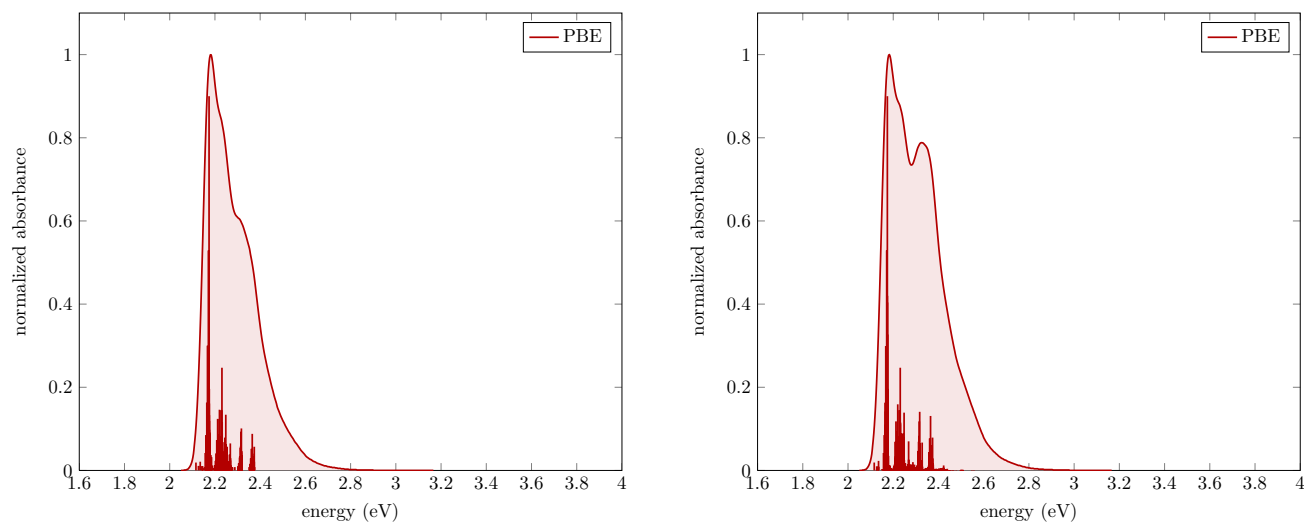

**Fig. S33** UV/vis absorption spectra of TOTA computed within the (left) Franck-Condon and (right) Franck-Condon-Herzberg-Teller approximations at PBE/6-31+G\* level of theory in acetonitrile solvent. The envelope of each spectrum is obtained by a Gaussian convolution (FWHM = 250 cm<sup>-1</sup>) of the vibronic transitions (sticks) between the  $S_0$  and  $S_1$  electronic states.



### 4.3 B3LYP

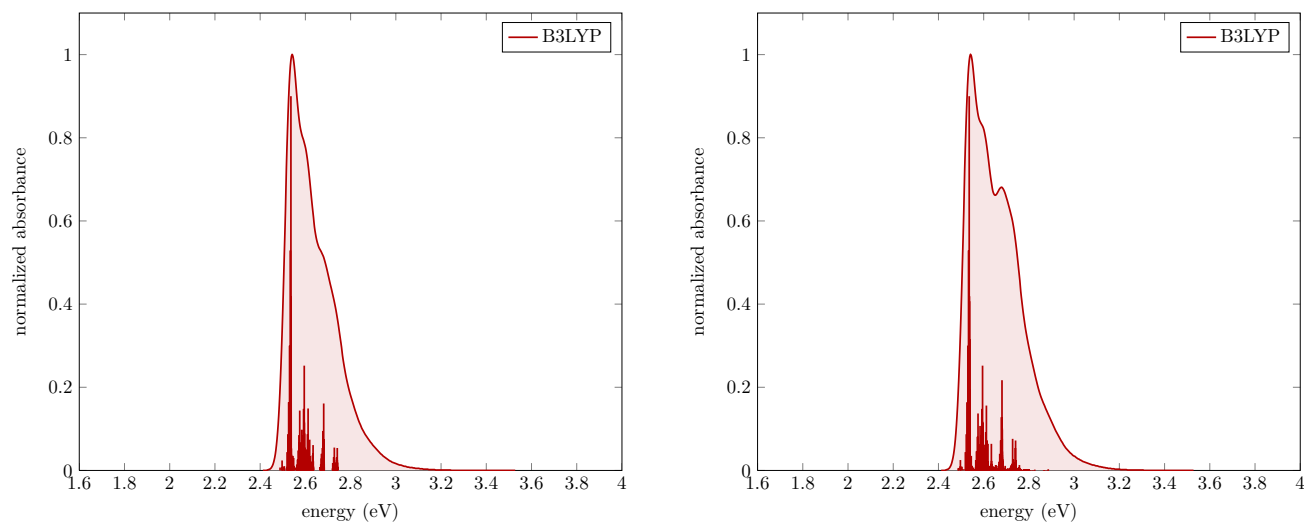

**Fig. S34** UV/vis absorption spectra of TOTA computed within the (left) Franck-Condon and (right) Franck-Condon-Herzberg-Teller approximations at B3LYP/6-31+G\* level of theory in acetonitrile solvent. The envelope of each spectrum is obtained by a Gaussian convolution (FWHM = 250 cm<sup>-1</sup>) of the vibronic transitions (sticks) between the  $S_0$  and  $S_1$  electronic states.

## 4.4 PBE0

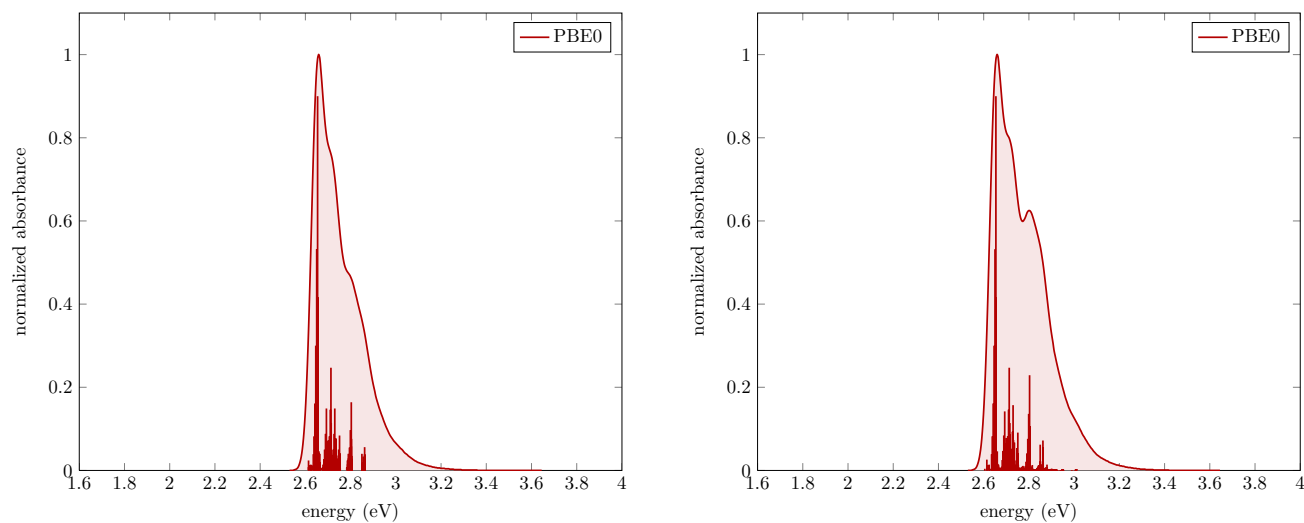

**Fig. S35** UV/vis absorption spectra of TOTA computed within the (left) Franck-Condon and (right) Franck-Condon-Herzberg-Teller approximations at PBE0/6-31+G\* level of theory in acetonitrile solvent. The envelope of each spectrum is obtained by a Gaussian convolution (FWHM = 250 cm<sup>-1</sup>) of the vibronic transitions (sticks) between the  $S_0$  and  $S_1$  electronic states.

## 4.5 M06

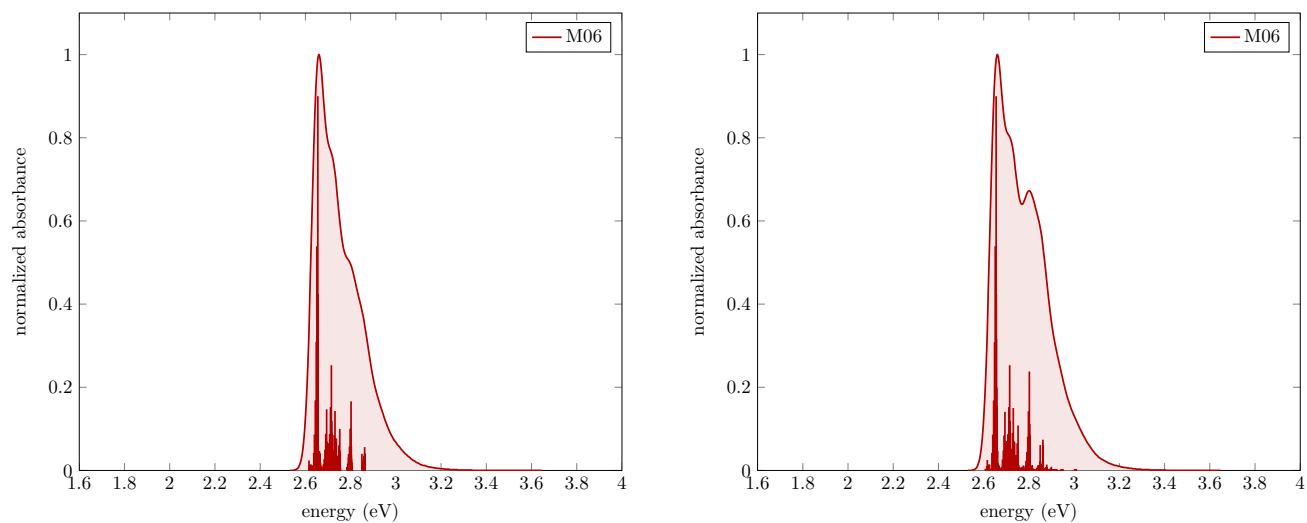

**Fig. S36** UV/vis absorption spectra of TOTA computed within the (left) Franck-Condon and (right) Franck-Condon-Herzberg-Teller approximations at M06/6-31+G\* level of theory in acetonitrile solvent. The envelope of each spectrum is obtained by a Gaussian convolution (FWHM = 250 cm<sup>-1</sup>) of the vibronic transitions (sticks) between the  $S_0$  and  $S_1$  electronic states.

## 4.6 BMK

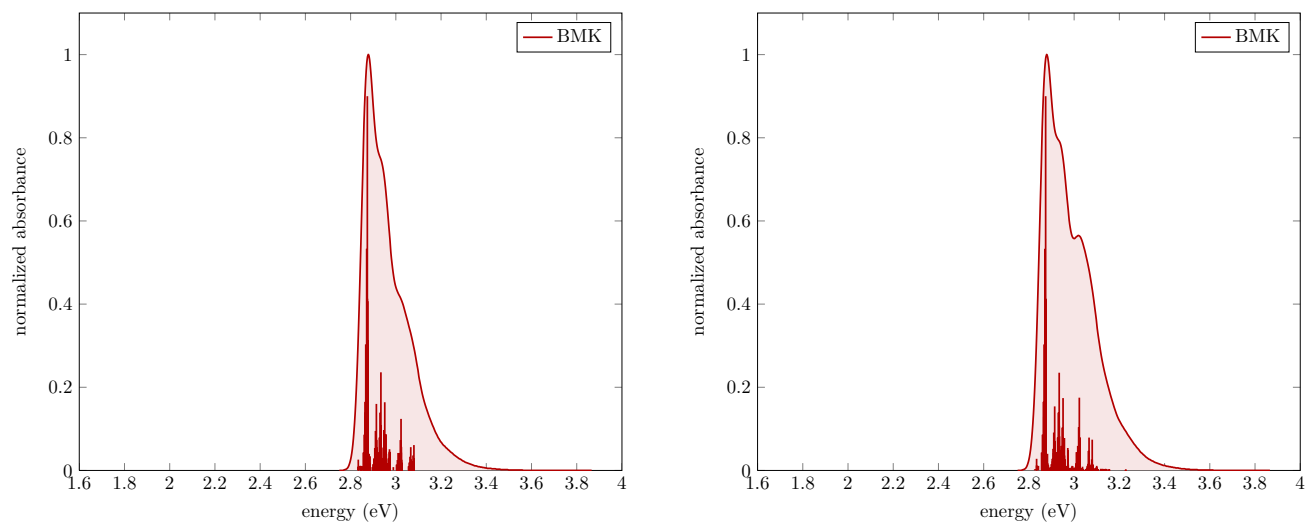

**Fig. S37** UV/vis absorption spectra of TOTA computed within the (left) Franck-Condon and (right) Franck-Condon-Herzberg-Teller approximations at BMK/6-31+G\* level of theory in acetonitrile solvent. The envelope of each spectrum is obtained by a Gaussian convolution (FWHM = 250 cm<sup>-1</sup>) of the vibronic transitions (sticks) between the  $S_0$  and  $S_1$  electronic states.

## 4.7 M06-2X

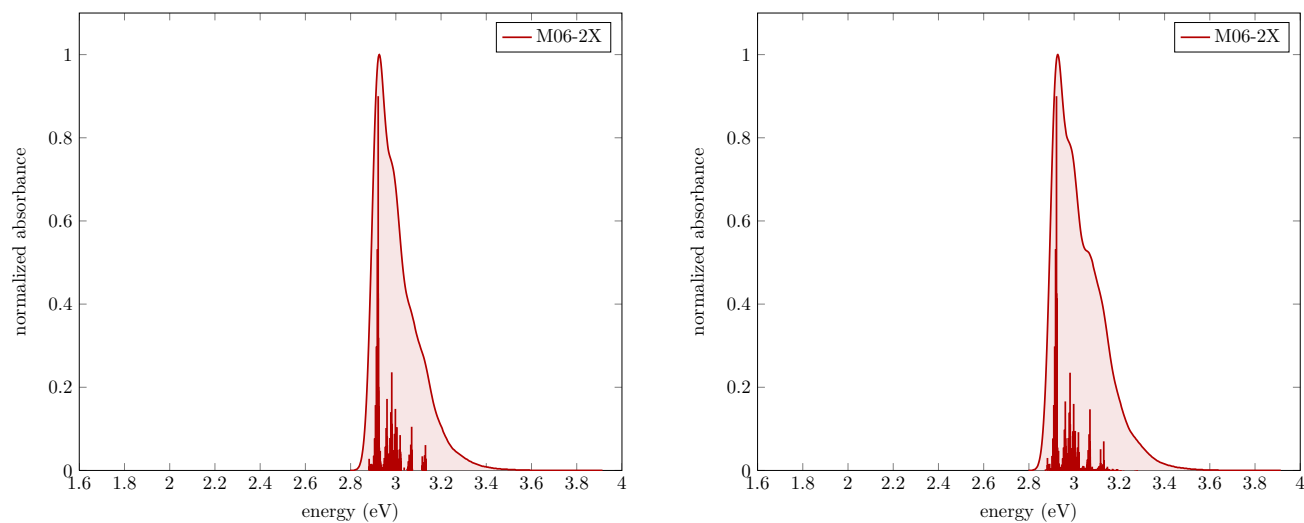

**Fig. S38** UV/vis absorption spectra of TOTA computed within the (left) Franck-Condon and (right) Franck-Condon-Herzberg-Teller approximations at M06-2X/6-31+G\* level of theory in acetonitrile solvent. The envelope of each spectrum is obtained by a Gaussian convolution (FWHM = 250 cm<sup>-1</sup>) of the vibronic transitions (sticks) between the  $S_0$  and  $S_1$  electronic states.

## 4.8 M06-HF

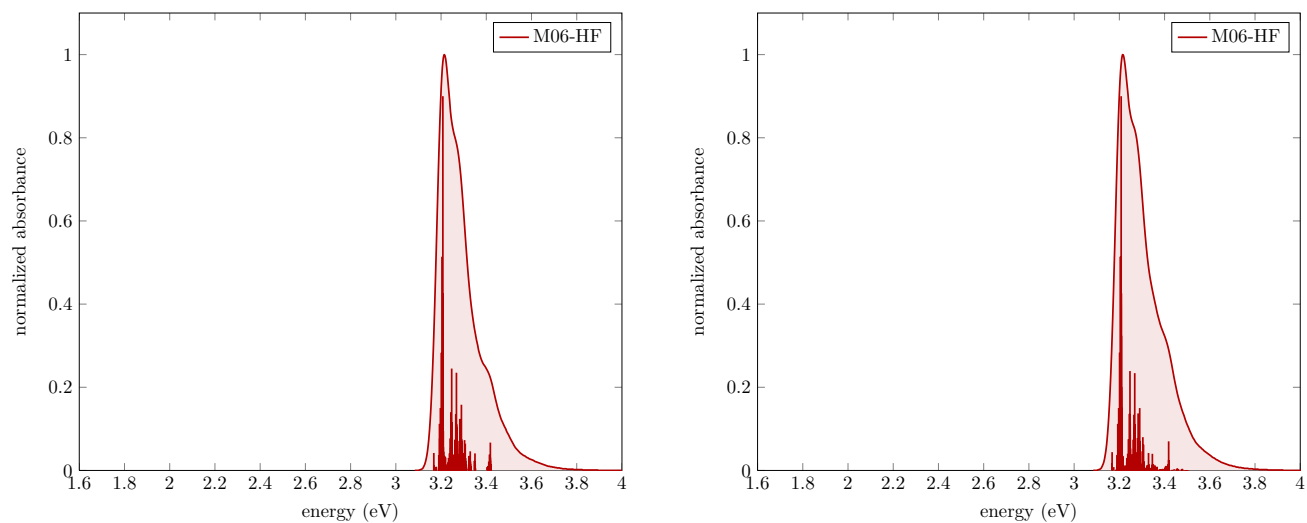

**Fig. S39** UV/vis absorption spectra of TOTA computed within the (left) Franck-Condon and (right) Franck-Condon-Herzberg-Teller approximations at M06-HF/6-31+G\* level of theory in acetonitrile solvent. The envelope of each spectrum is obtained by a Gaussian convolution (FWHM = 250 cm<sup>-1</sup>) of the vibronic transitions (sticks) between the  $S_0$  and  $S_1$  electronic states.

## 4.9 $\omega$ B97XD

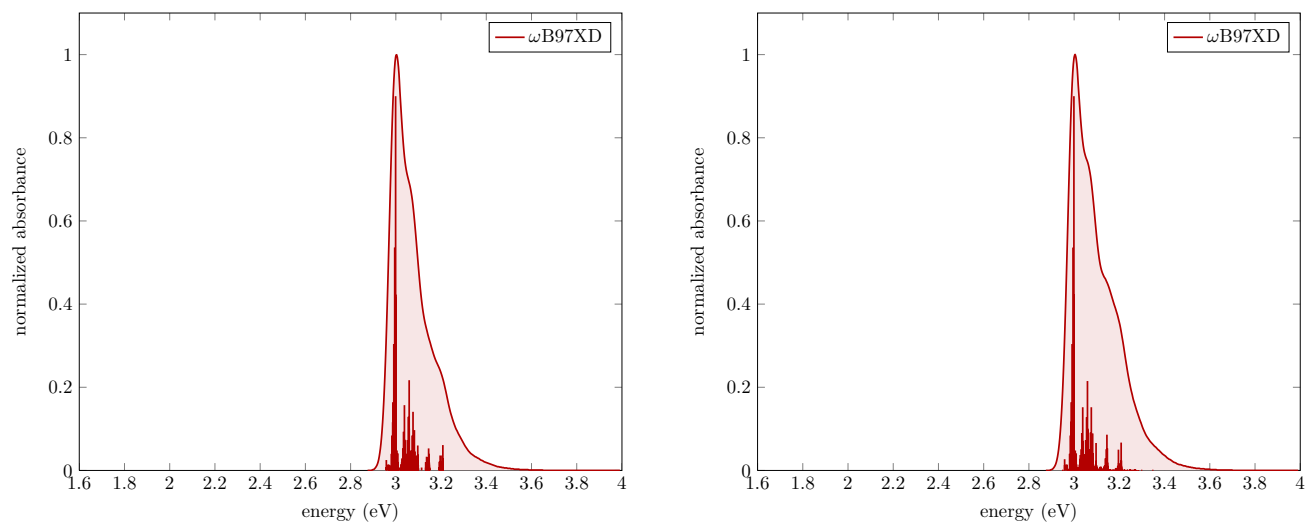

**Fig. S40** UV/vis absorption spectra of TOTA computed within the (left) Franck-Condon and (right) Franck-Condon-Herzberg-Teller approximations at  $\omega$ B97XD/6-31+G\* level of theory in acetonitrile solvent. The envelope of each spectrum is obtained by a Gaussian convolution (FWHM = 250 cm<sup>-1</sup>) of the vibronic transitions (sticks) between the  $S_0$  and  $S_1$  electronic states.

## 4.10 CAM-B3LYP

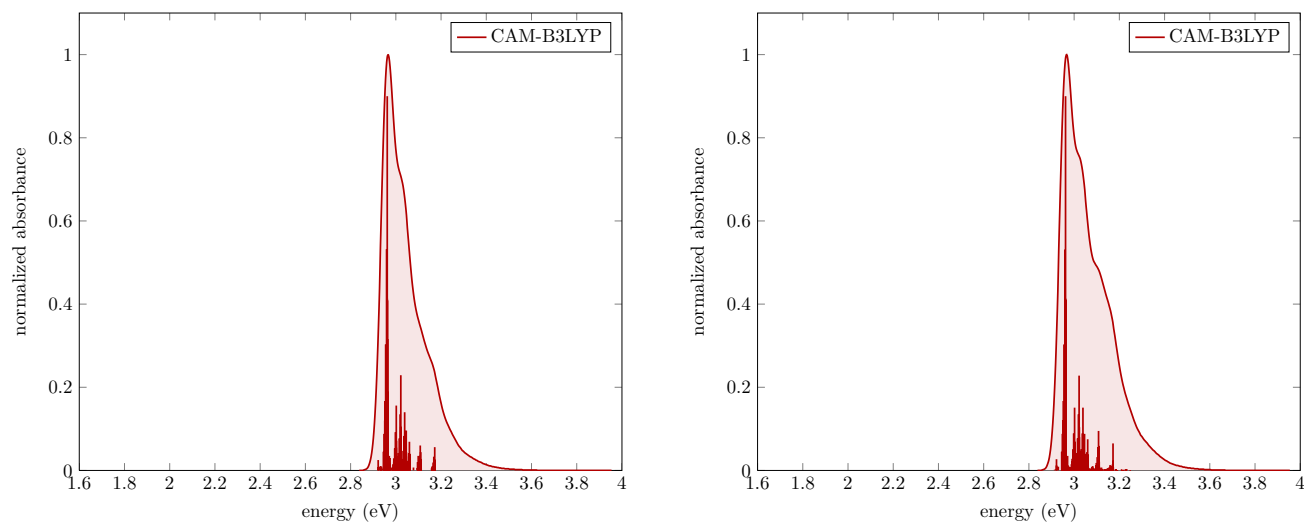

**Fig. S41** UV/vis absorption spectra of TOTA computed within the (left) Franck-Condon and (right) Franck-Condon-Herzberg-Teller approximations at CAM-B3LYP/6-31+G\* level of theory in acetonitrile solvent. The envelope of each spectrum is obtained by a Gaussian convolution (FWHM = 250 cm<sup>-1</sup>) of the vibronic transitions (sticks) between the  $S_0$  and  $S_1$  electronic states.



# Basis-Set Benchmark

## 5 TATA

### 5.1 STO-3G

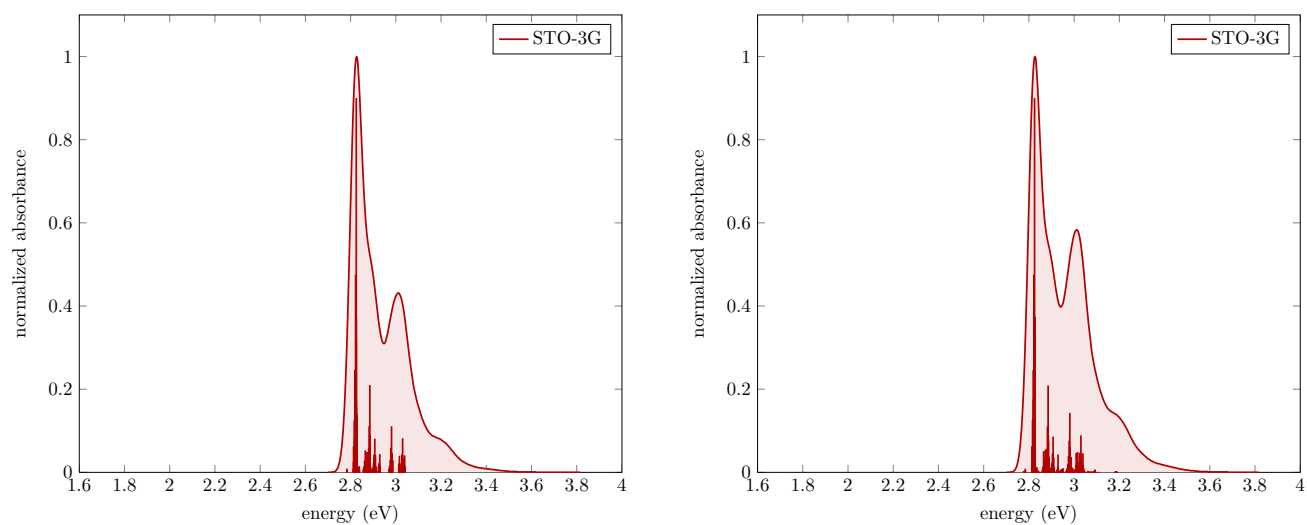

**Fig. S42** UV/vis absorption spectra of TATA computed within the (left) Franck-Condon and (right) Franck-Condon-Herzberg-Teller approximations at PBE0/STO-3G level of theory in acetonitrile solvent. The envelope of each spectrum is obtained by a Gaussian convolution ( $\text{FWHM} = 250 \text{ cm}^{-1}$ ) of the vibronic transitions (sticks) between the  $S_0$  and  $S_1$  electronic states.

## 5.2 6-31G

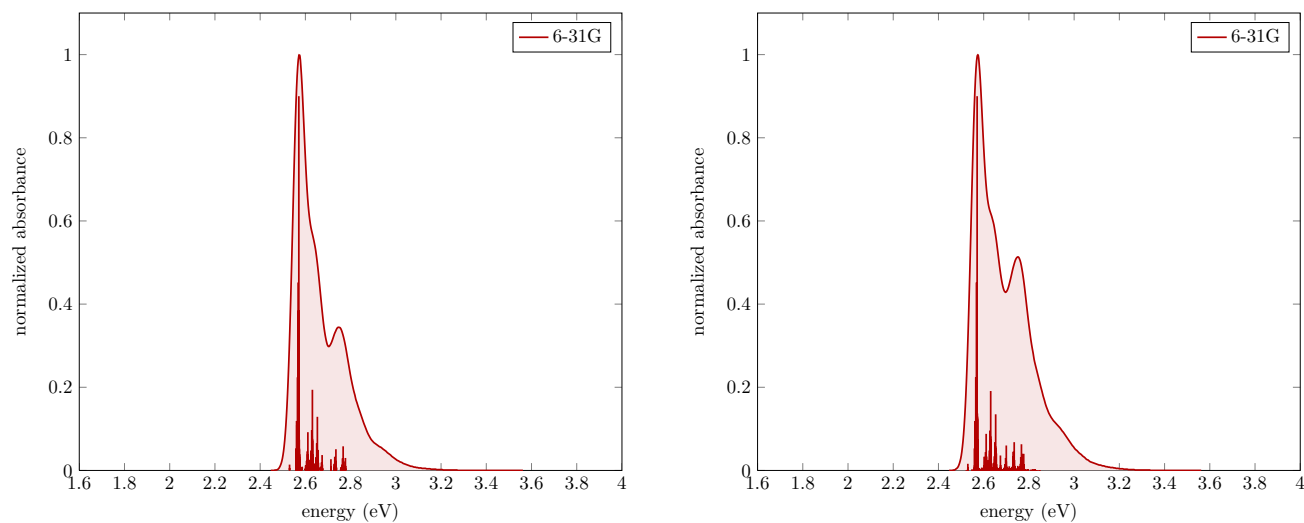

**Fig. S43** UV/vis absorption spectra of TATA computed within the (left) Franck-Condon and (right) Franck-Condon-Herzberg-Teller approximations at PBE0/6-31G level of theory in acetonitrile solvent. The envelope of each spectrum is obtained by a Gaussian convolution (FWHM = 250 cm<sup>-1</sup>) of the vibronic transitions (sticks) between the  $S_0$  and  $S_1$  electronic states.

### 5.3 6-31+G\*

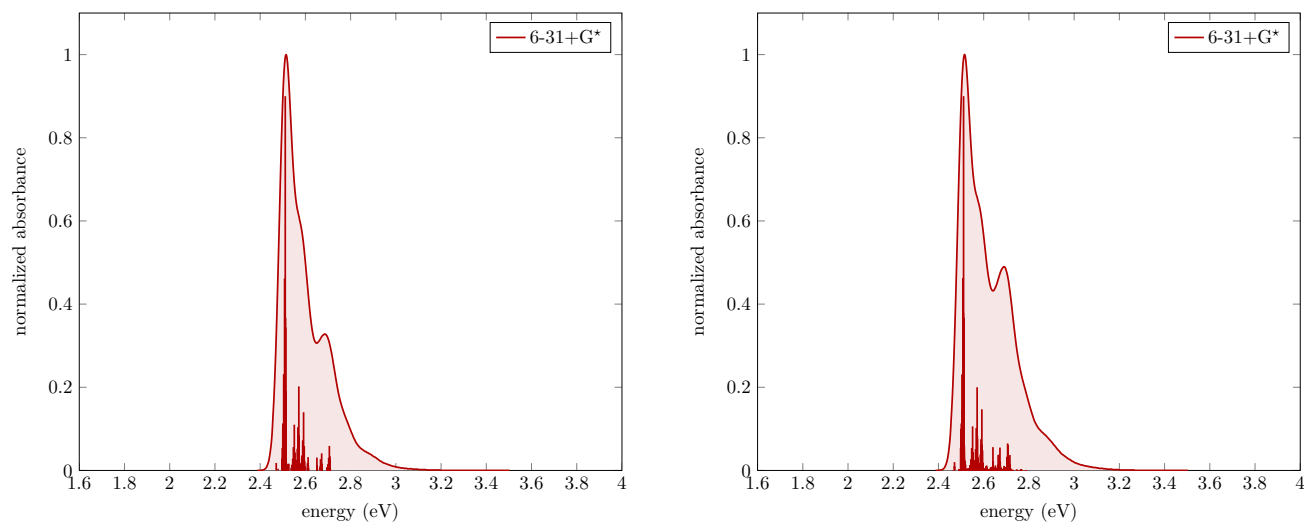

**Fig. S44** UV/vis absorption spectra of TATA computed within the (left) Franck-Condon and (right) Franck-Condon-Herzberg-Teller approximations at PBE0/6-31+G\* level of theory in acetonitrile solvent. The envelope of each spectrum is obtained by a Gaussian convolution (FWHM = 250 cm<sup>-1</sup>) of the vibronic transitions (sticks) between the  $S_0$  and  $S_1$  electronic states.

## 5.4 6-31++G\*\*

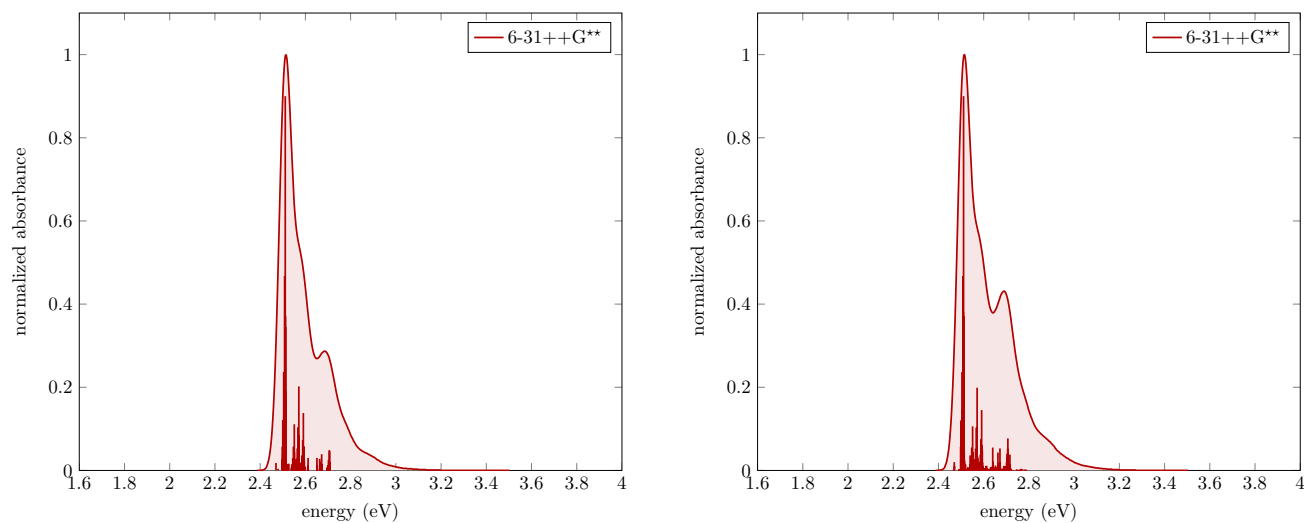

**Fig. S45** UV/vis absorption spectra of TATA computed within the (left) Franck-Condon and (right) Franck-Condon-Herzberg-Teller approximations at PBE0/6-31++G\*\* level of theory in acetonitrile solvent. The envelope of each spectrum is obtained by a Gaussian convolution (FWHM = 250 cm<sup>-1</sup>) of the vibronic transitions (sticks) between the  $S_0$  and  $S_1$  electronic states.

## 5.5 6-311G

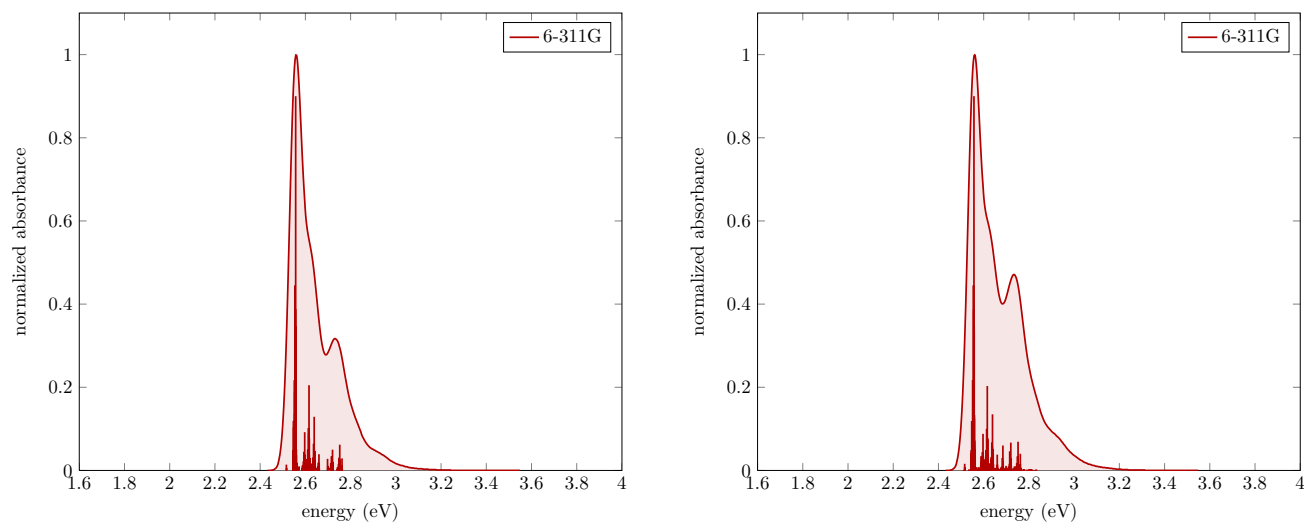

**Fig. S46** UV/vis absorption spectra of TATA computed within the (left) Franck-Condon and (right) Franck-Condon-Herzberg-Teller approximations at PBE0/6-311G level of theory in acetonitrile solvent. The envelope of each spectrum is obtained by a Gaussian convolution (FWHM =  $250\text{ cm}^{-1}$ ) of the vibronic transitions (sticks) between the  $S_0$  and  $S_1$  electronic states.

## 5.6 6-311+G\*

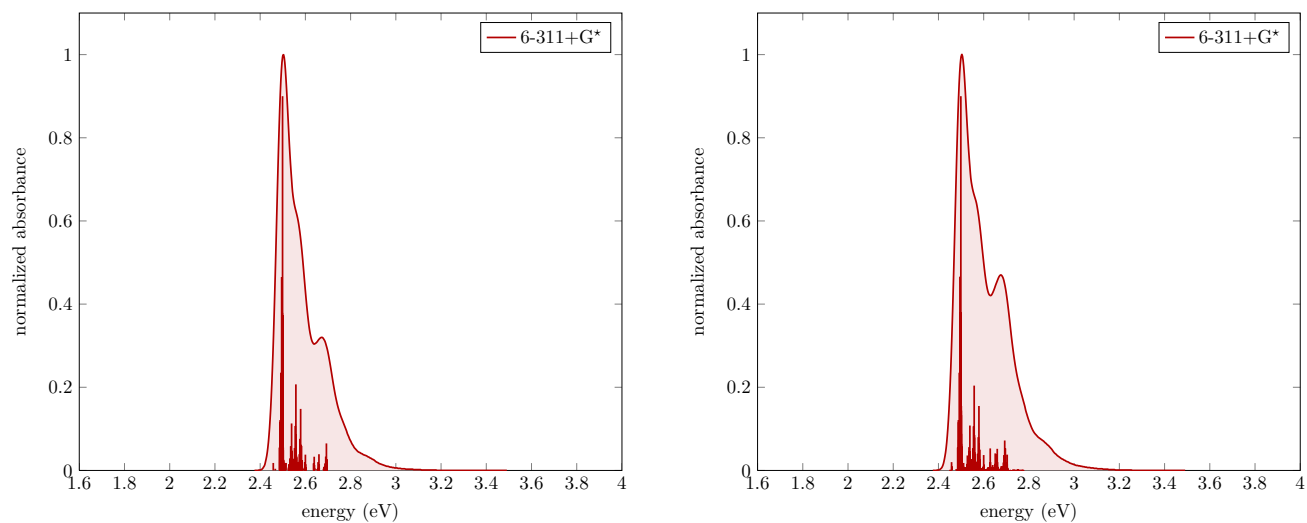

**Fig. S47** UV/vis absorption spectra of TATA computed within the (left) Franck-Condon and (right) Franck-Condon-Herzberg-Teller approximations at PBE0/6-311+G\* level of theory in acetonitrile solvent. The envelope of each spectrum is obtained by a Gaussian convolution (FWHM = 250 cm<sup>-1</sup>) of the vibronic transitions (sticks) between the  $S_0$  and  $S_1$  electronic states.

## 5.7 6-311++G\*\*

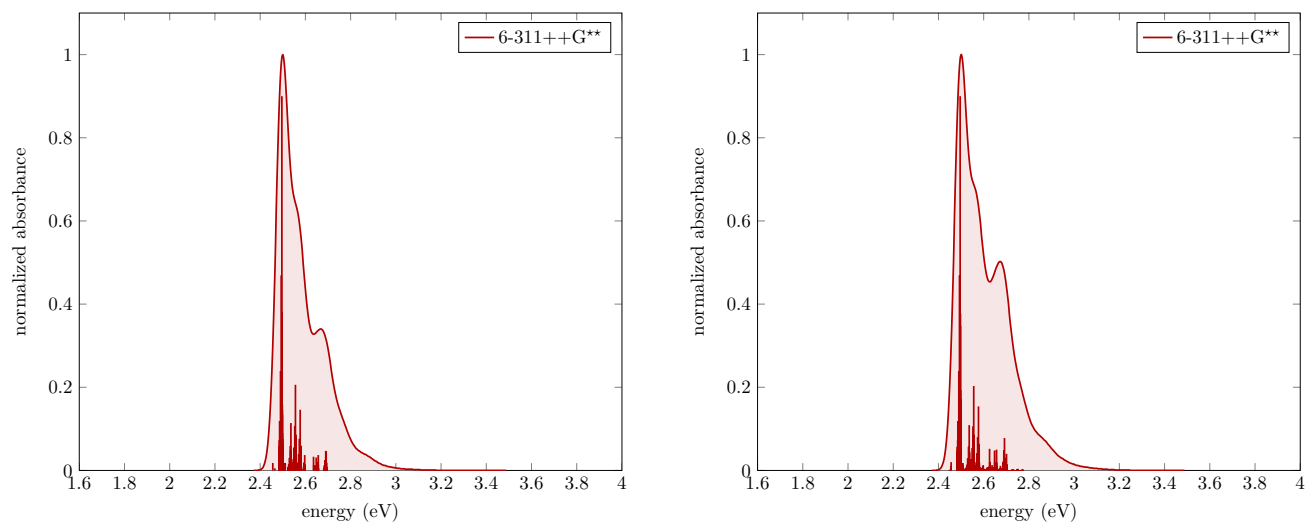

**Fig. S48** UV/vis absorption spectra of TATA computed within the (left) Franck-Condon and (right) Franck-Condon-Herzberg-Teller approximations at PBE0/6-311++G\*\* level of theory in acetonitrile solvent. The envelope of each spectrum is obtained by a Gaussian convolution (FWHM = 250 cm<sup>-1</sup>) of the vibronic transitions (sticks) between the  $S_0$  and  $S_1$  electronic states.

## 5.8 6-311++G(3df,3pd)

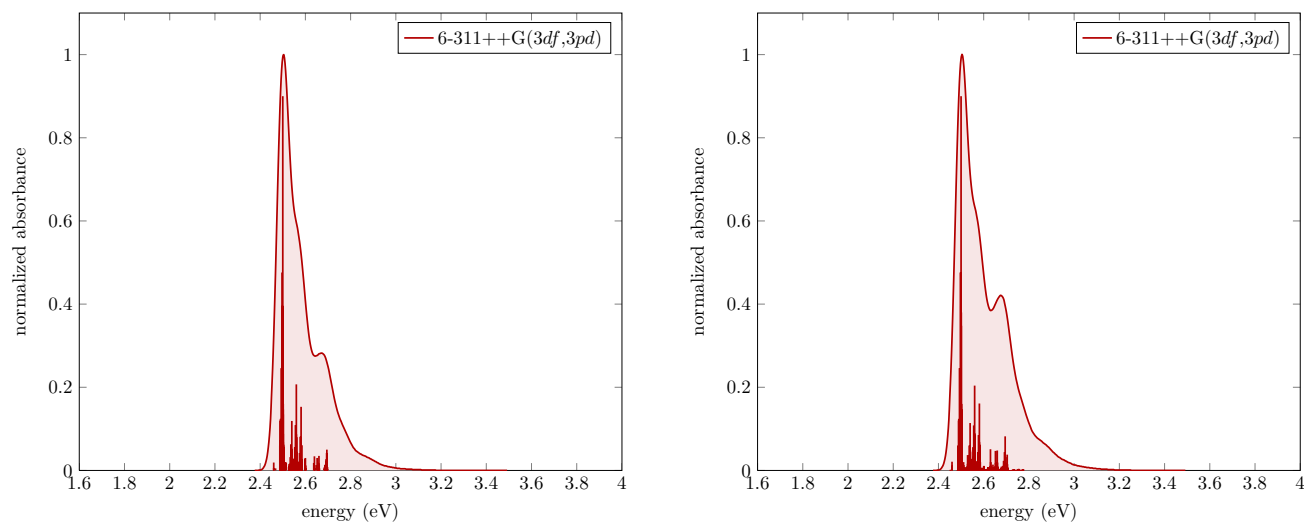

**Fig. S49** UV/vis absorption spectra of TATA computed within the (left) Franck-Condon and (right) Franck-Condon-Herzberg-Teller approximations at PBE0/6-311++G(3df,3pd) level of theory in acetonitrile solvent. The envelope of each spectrum is obtained by a Gaussian convolution (FWHM = 250 cm<sup>-1</sup>) of the vibronic transitions (sticks) between the  $S_0$  and  $S_1$  electronic states.



# Solvent Benchmark

## 6 TATA

### 6.1 gaz

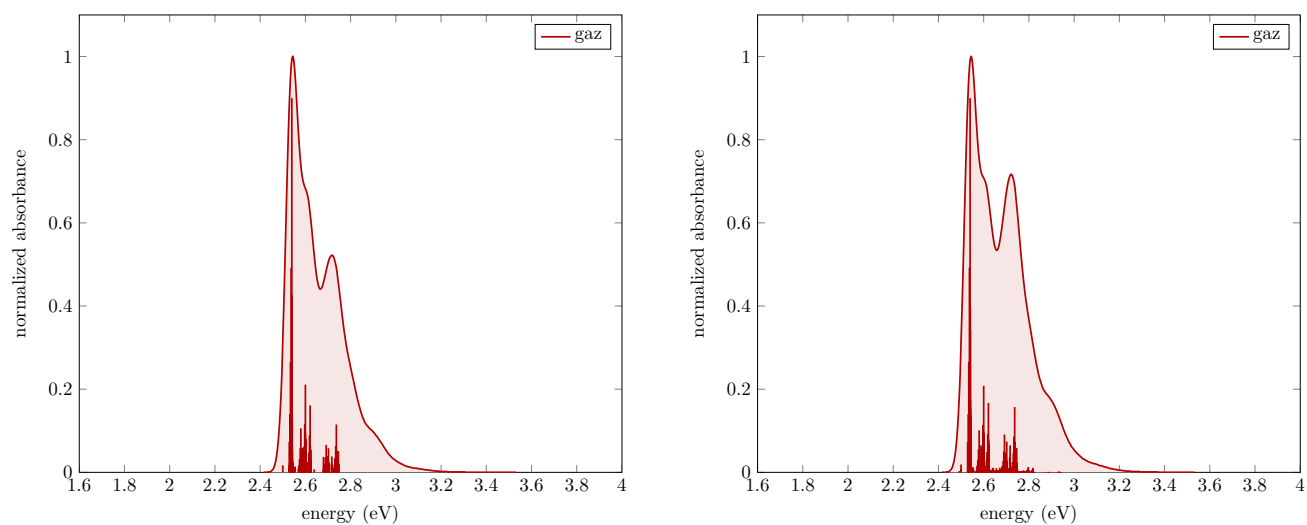

**Fig. S50** UV/vis absorption spectra of TATA computed within the (left) Franck-Condon and (right) Franck-Condon-Herzberg-Teller approximations at PBE0/6-31+G\* level of theory in gaz solvent. The envelope of each spectrum is obtained by a Gaussian convolution (FWHM = 250 cm<sup>-1</sup>) of the vibronic transitions (sticks) between the  $S_0$  and  $S_1$  electronic states.

## 6.2 *n*-octane

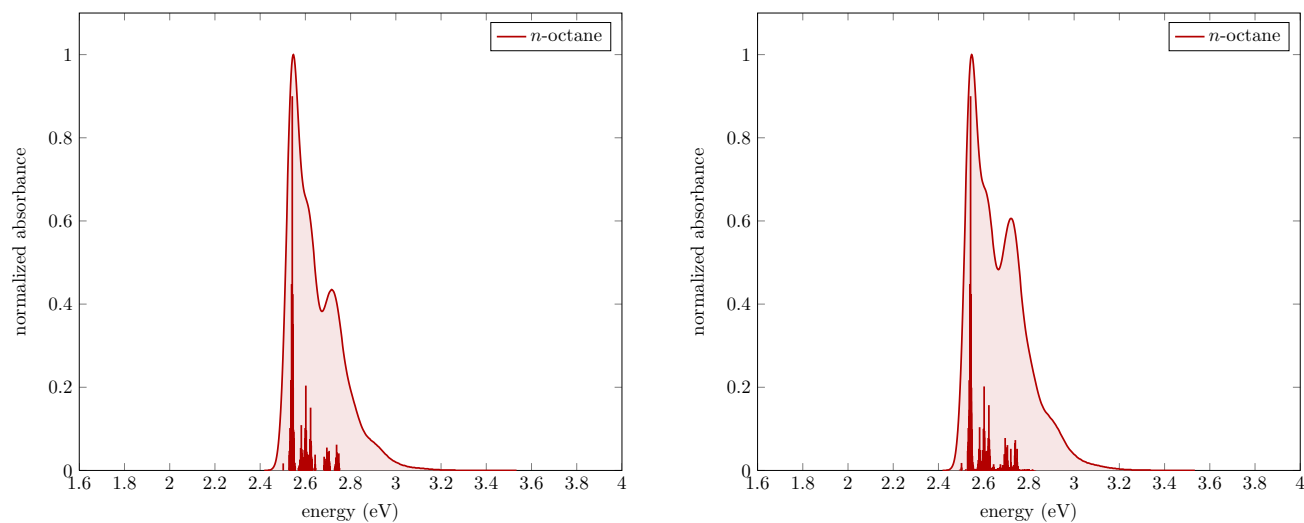

**Fig. S51** UV/vis absorption spectra of TATA computed within the (left) Franck-Condon and (right) Franck-Condon-Herzberg-Teller approximations at PBE0/6-31+G\* level of theory in *n*-octane solvent. The envelope of each spectrum is obtained by a Gaussian convolution (FWHM = 250 cm<sup>-1</sup>) of the vibronic transitions (sticks) between the  $S_0$  and  $S_1$  electronic states.

### 6.3 acetonitrile

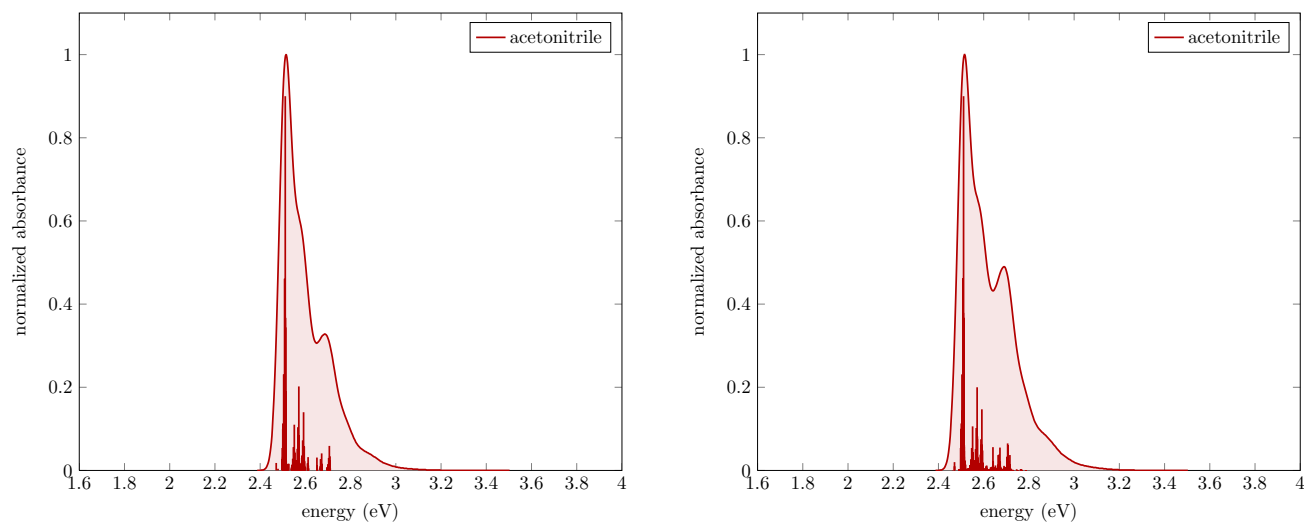

**Fig. S52** UV/vis absorption spectra of TATA computed within the (left) Franck-Condon and (right) Franck-Condon-Herzberg-Teller approximations at PBE0/6-31+G\* level of theory in acetonitrile solvent. The envelope of each spectrum is obtained by a Gaussian convolution (FWHM = 250 cm<sup>-1</sup>) of the vibronic transitions (sticks) between the  $S_0$  and  $S_1$  electronic states.

## 6.4 1-hexanol

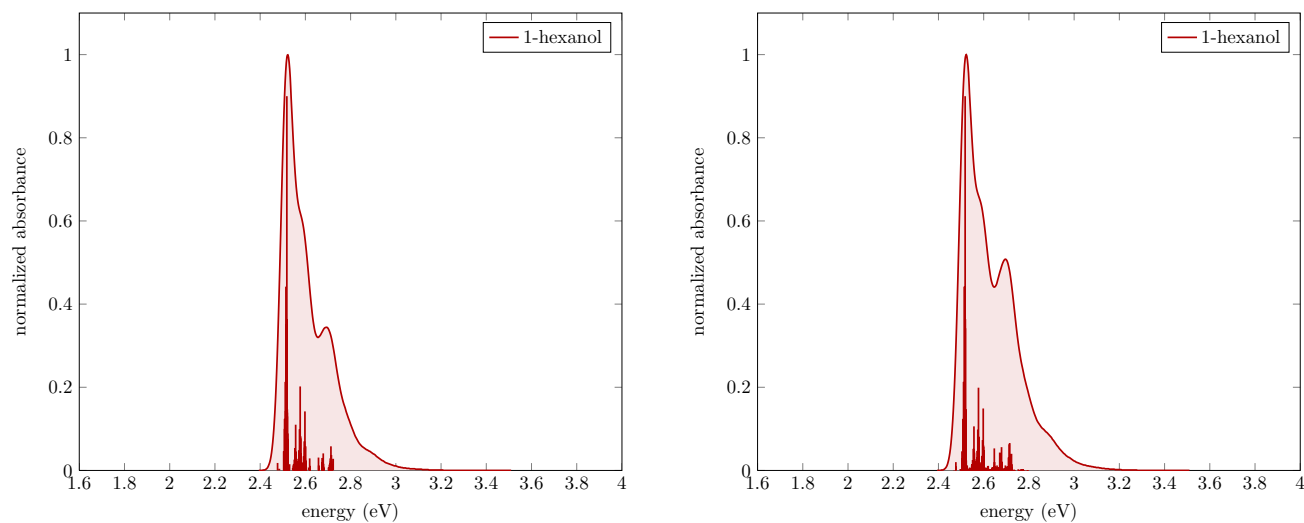

**Fig. S53** UV/vis absorption spectra of TATA computed within the (left) Franck-Condon and (right) Franck-Condon-Herzberg-Teller approximations at PBE0/6-31+G\* level of theory in 1-hexanol solvent. The envelope of each spectrum is obtained by a Gaussian convolution (FWHM =  $250\text{ cm}^{-1}$ ) of the vibronic transitions (sticks) between the  $S_0$  and  $S_1$  electronic states.

## 6.5 dimethylsulfoxide

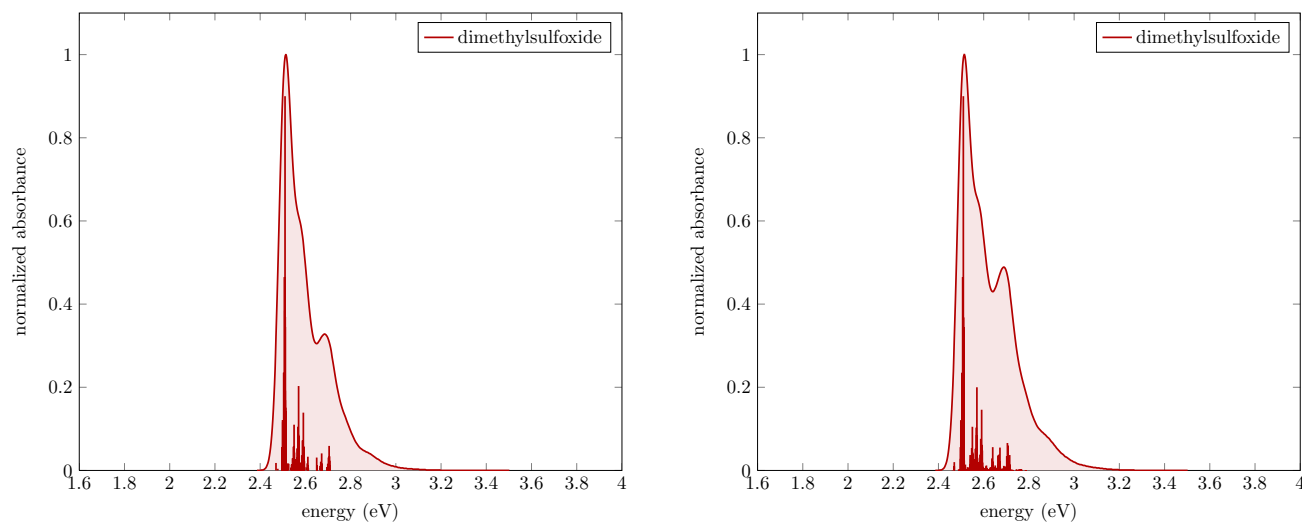

**Fig. S54** UV/vis absorption spectra of TATA computed within the (left) Franck-Condon and (right) Franck-Condon-Herzberg-Teller approximations at PBE0/6-31+G\* level of theory in dimethylsulfoxide solvent. The envelope of each spectrum is obtained by a Gaussian convolution (FWHM = 250 cm<sup>-1</sup>) of the vibronic transitions (sticks) between the  $S_0$  and  $S_1$  electronic states.

## 6.6 water

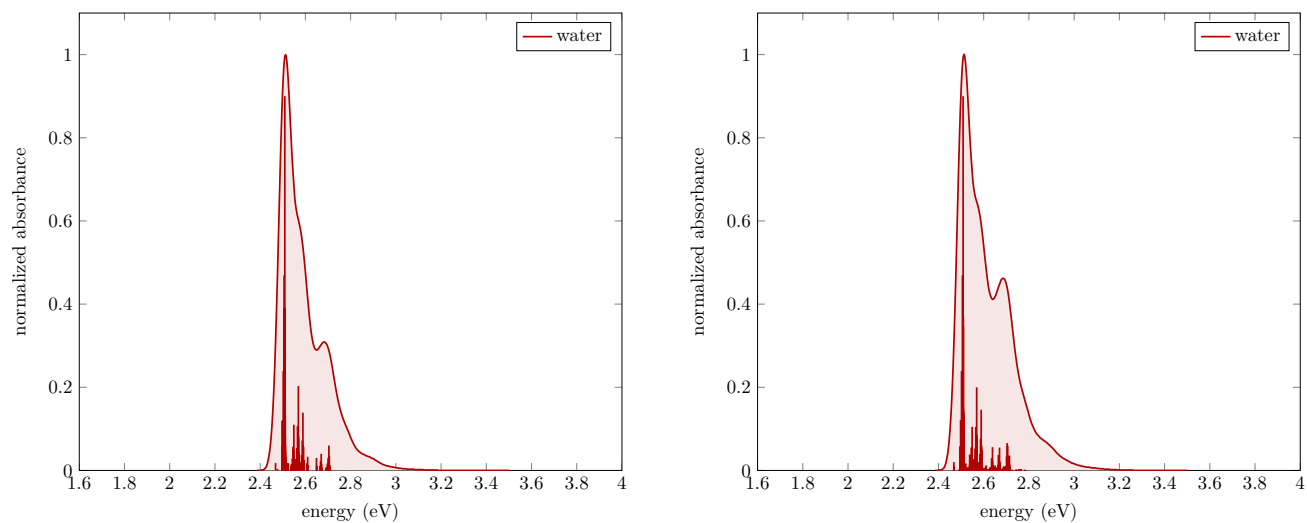

**Fig. S55** UV/vis absorption spectra of TATA computed within the (left) Franck-Condon and (right) Franck-Condon-Herzberg-Teller approximations at PBE0/6-31+G\* level of theory in water solvent. The envelope of each spectrum is obtained by a Gaussian convolution (FWHM =  $250\text{ cm}^{-1}$ ) of the vibronic transitions (sticks) between the  $S_0$  and  $S_1$  electronic states.
